# Supplementary material for: Fungal Stress Database (FSD)––a repository of fungal stress physiological data
Source: Database (Oxford). 2018 Feb 12;2018:bay009. doi: 10.1093/database/bay009 (PMC5810435; doi:10.1093/database/bay009)
Supplement: Supplementary TableS1 [file bay009_supp_tables1.doc]

**Supplementary Table S1.** Publications in the field of stress research in the aspergilli published between 2005-2015

| **Summary Table** | | | | | | | |
| --- | --- | --- | --- | --- | --- | --- | --- |
| **Year** | **Number of papers** | **Stress types** | | | | | **The total number of stress conditions tested in the papers** |
| **Oxidative** | **Osmotic** | **CWI** | **Heavy metal** | **Other** |
| 2005 | **31** | 14 | 4 | 3 | 1 | 11 | **33** |
| 2006 | **24** | 13 | 2 | 0 | 2 | 10 | **27** |
| 2007 | **31** | 18 | 5 | 4 | 2 | 7 | **36** |
| 2008 | **45** | 23 | 6 | 6 | 1 | 16 | **52** |
| 2009 | **36** | 18 | 4 | 3 | 0 | 20 | **45** |
| 2010 | **48** | 24 | 4 | 6 | 2 | 17 | **53** |
| 2011 | **58** | 25 | 12 | 13 | 0 | 20 | **70** |
| 2012 | **50** | 22 | 9 | 11 | 0 | 20 | **62** |
| 2013 | **69** | 25 | 6 | 16 | 0 | 31 | **78** |
| 2014 | **62** | 29 | 8 | 9 | 4 | 23 | **73** |
| 2015 | **71** | 38 | 12 | 12 | 2 | 17 | **81** |
| **Sum** | **525** | **249** | **72** | **83** | **14** | **192** | **610** |
| **610** | | | | |

| **Publications in the field of stress research in the aspergilli published between 2005-2015** | | | **PubMed/DOI/ISSN IDs** | **Stress types** | | |
| --- | --- | --- | --- | --- | --- | --- |
| **Year** | **Papers** | |  |  |  |  |
| **2015** | 1 | **Title:**Amphotericin B Resistance in Aspergillus terreus Is Overpowered by Coapplication of Pro-oxidants | **PubMed ID:**26054424 | **oxidative** |  |  |
| **2** | **Title:**Copper-induced adaptation, oxidative stress and its tolerance in Aspergillus niger UCP1261 | **DOI:**10.1016/j.ejbt.2015.09.006 | **oxidative** |  |  |
| **3** | **Title:**Systematic gene deletion and functional characterization of histidine kinase phosphorelay receptors (HKRs) in the human pathogenic fungus Aspergillus fumigatus | **PubMed ID:**26365385 | **oxidative** |  |  |
| **4** | **Title:**Further characterization of the role of the mitochondrial high-mobility group box protein in the intracellular redox environment of Aspergillus nidulans | **PubMed ID:**26297166 | **oxidative** |  |  |
| **5** | **Title:**Menadione-Induced Oxidative Stress Re-Shapes the Oxylipin Profile of Aspergillus flavus and Its Lifestyle | **PubMed ID:**26512693 | **oxidative** |  |  |
| **6** | **Title:**Impact of the antifungal protein PgAFP from Penicillium chrysogenum on the protein profile in Aspergillus flavus | **PubMed ID:**26078108 | **oxidative** |  |  |
| **7** | **Title:**Different Stress-Induced Calcium Signatures Are Reported by Aequorin-Mediated Calcium Measurements in Living Cells of Aspergillus fumigatus | **PubMed ID:**26402916 | **oxidative** |  |  |
| **8** | **Title:**The F-box protein Fbx15 of Aspergillus fumigatus controls nuclear transport of the transcriptional co-repressor SsnF/Ssn6p upon oxidative stress | **DOI:**10.3390/toxins7104315 | **oxidative** |  |  |
| **9** | **Title:**A Caleosin-Like Protein with Peroxygenase Activity Mediates Aspergillus flavus Development, Aflatoxin Accumulation, and Seed Infection | **PubMed ID:**26116672 | **oxidative** |  |  |
| **10** | **Title:**The Aspergillus fumigatus pkcA(G579R) Mutant Is Defective in the Activation of the Cell Wall Integrity Pathway but Is Dispensable for Virulence in a Neutropenic Mouse Infection Model | **PubMed ID:**26295576 | **oxidative** |  |  |
| **11** | **Title:**Effects of Hydrogen Peroxide on Different Toxigenic and Atoxigenic Isolates of Aspergillus flavus | **PubMed ID:**26251922 | **oxidative** |  |  |
| **12** | **Title:**An Aspergillus flavus secondary metabolic gene cluster containing a hybrid PKS-NRPS is necessary for synthesis of the 2-pyridones, leporins | **PubMed ID:**26051490 | **oxidative** |  |  |
| **13** | Title: The Aspergillus fumigatus sitA Phosphatase Homologue Is Important for Adhesion, Cell Wall Integrity, Biofilm Formation, and Virulence | **PubMed ID:**25911225 | **oxidative** | **CWI** | **heavy metal** |
| **14** | **Title:**Blocking Hsp70 Enhances the Efficiency of Amphotericin B Treatment against Resistant Aspergillus terreus Strains | **PubMed ID:**25870060 | **oxidative** |  |  |
| **15** | **Title:**Systematic Global Analysis of Genes Encoding Protein Phosphatases in Aspergillus fumigatus | **PubMed ID:**25943523 | **oxidative** | **CWI** |  |
| **16** | **Title:**Comparative proteomics of a tor inducible Aspergillus fumigatus mutant reveals involvement of the Tor kinase in iron regulation | **PubMed ID:**25728394 | **oxidative** | **CWI** |  |
| **17** | **Title:**Core oxidative stress response in Aspergillus nidulans | **PubMed ID:**26115917 | **oxidative** |  |  |
| **18** | **Title:**Resistance to Aspergillus flavus in maize and peanut: Molecular biology, breeding, environmental stress, and future perspectives | **DOI:**10.1016/j.cj.2015.02.003 | **oxidative** |  |  |
| **19** | **Title:**Mitogen-activated protein kinases MpkA and MpkB independently affect micafungin sensitivity in Aspergillus nidulans | **PubMed ID:**25727969 | **oxidative** | **CWI** |  |
| **20** | **Title:**Defense Responses to Mycotoxin-Producing Fungi Fusarium proliferatum, F. subglutinans, and Aspergillus flavus in Kernels of Susceptible and Resistant Maize Genotypes | **PubMed ID:**26024441 | **oxidative** |  |  |
| **21** | **Title:**Differential gene expression in Aspergillus fumigatus induced by human platelets in vitro | **PubMed ID:**25661519 | **oxidative** |  |  |
| **22** | Title: The SrkA Kinase Is Part of the SakA Mitogen-Activated Protein Kinase Interactome and Regulates Stress Responses and Development in Aspergillus nidulans | **PubMed ID:**25820520 | **oxidative** | **osmotic** |  |
| **23** | **Title:**KdmA, a histone H3 demethylase with bipartite function, differentially regulates primary and secondary metabolism in Aspergillus nidulans | **PubMed ID:**25712266 | **oxidative** |  |  |
| **24** | **Title:**Iron acquisition and oxidative stress response in aspergillus fumigatus | **PubMed ID:**25908096 | **oxidative** |  |  |
| **25** | **Title:**The Aspergillus fumigatus cell wall integrity signaling pathway: drug target, compensatory pathways, and virulence | **PubMed ID:**25932027 | **oxidative** | **CWI** |  |
| **26** | **Title:**Inhibition of aflatoxin metabolism and growth of Aspergillus flavus in liquid culture by a DNA methylation inhibitor | **PubMed ID:**25312249 | **oxidative** |  |  |
| **27** | **Title:**Aflatoxin production and oxidative stress in Aspergillus flavus | **ISSN:**0031-949X | **oxidative** |  |  |
| **28** | **Title:**Mechanism of Cr(VI) reduction by Aspergillus niger: enzymatic characteristic, oxidative stress response, and reduction product | **PubMed ID:**25408081 | **oxidative** | **CWI** |  |
| **29** | **Title:**Identification and mutational analyses of phosphorylation sites of the calcineurin-binding protein CbpA and the identification of domains required for calcineurin binding in Aspergillus fumigatus | **PubMed ID:**25821446 | **oxidative** |  |  |
| **30** | **Title:**Superoxide dismutase reduces the inflammatory response to Aspergillus and Alternaria in human sinonasal epithelial cells derived from patients with chronic rhinosinusitis | **PubMed ID:**25785747 | **oxidative** |  |  |
| **31** | **Title:**Morphological transitions under oxidative stress in response to metabolite formation in Aspergillus niger | **PubMed ID:**25367801 | **oxidative** | **osmotic** |  |
| **32** | **Title:**gamma-Glutamyl transpeptidase (GgtA) of Aspergillus nidulans is not necessary for bulk degradation of glutathione | **PubMed ID:**25519188 | **oxidative** |  |  |
| **33** | **Title:**Redox Metabolites Signal Polymicrobial Biofilm Development via the NapA Oxidative Stress Cascade in Aspergillus | **PubMed ID:**25532893 | **oxidative** |  |  |
| **34** | **Title:**Exposure of Aspergillus fumigatus to T-2 toxin results in a stress response associated with exacerbation of aspergillosis in poultry | **DOI:**10.3920/WMJ2014.1765 | **oxidative** |  |  |
| **35** | **Title:**Aspergillus flavus impairs antioxidative enzymes of Sternochetus mangzferae during mycosis | **PubMed ID:**25446036 | **oxidative** |  |  |
| **36** | **Title:**Reactive oxygen species regulate lovastatin biosynthesis in Aspergillus terreus during submerged and solid-state fermentations | **PubMed ID:**25457945 | **oxidative** |  |  |
| **37** | **Title:**The role of AtfA and HOG MAPK pathway in stress tolerance in conidia of Aspergillus fumigatus | **PubMed ID:**25459537 | **oxidative** | **osmotic** |  |
| **38** | **Title:**Whole-Genome Comparison of Aspergillus fumigatus Strains Serially Isolated from Patients with Aspergillosis | **PubMed ID:**25232160 | **oxidative** |  |  |
| **39** | **Title:**Aspergillus glaucus Aquaglyceroporin Gene glpF Confers High Osmosis Tolerance in Heterologous Organisms | **PubMed ID:**26209670 | **osmotic** |  |  |
| **40** | **Title:**Network Modeling Reveals Cross Talk of MAP Kinases during Adaptation to Caspofungin Stress in Aspergillus fumigatus | **PubMed ID:**26356475 | **osmotic** |  |  |
| **41** | **Title:**Concomitant osmotic and chaotropicity-induced stresses in Aspergillus wentii: compatible solutes determine the biotic window | **PubMed ID:**26055444 | **osmotic** |  |  |
| **42** | **Title:**High osmolarity glycerol response PtcB phosphatase is important for Aspergillus fumigatus virulence | **PubMed ID:**25597841 | **osmotic** |  |  |
| **43** | **Title:**Proteomic profile of Aspergillus flavus in response to water activity | **PubMed ID:**25749363 | **osmotic** |  |  |
| **44** | **Title:**Functionality and prevalence of trehalose-based oligosaccharides as novel compatible solutes in ascospores of Neosartorya fischeri (Aspergillus fischeri) and other fungi | **PubMed ID:**25040129 | **osmotic** |  |  |
| **45** | **Title:**A Ribosomal Protein AgRPS3aE from Halophilic Aspergillus glaucus Confers Salt Tolerance in Heterologous Organisms | **PubMed ID:**25642759 | **osmotic** |  |  |
| **46** | **Title:**Negative regulation of the vacuole-mediated resistance to K+ stress by a novel C2H2 zinc finger transcription factor encoded by aslA in Aspergillus nidulans | **PubMed ID:**25626364 | **osmotic** |  |  |
| **47** | **Title:**Expression, characterization and mutagenesis of an FAD-dependent glucose dehydrogenase from Aspergillus terreus | **PubMed ID:**25435504 | **osmotic** |  |  |
| **48** | **Title:**The Aspergillus fumigatus septins play pleiotropic roles in septation, conidiation, and cell wall stress, but are dispensable for virulence | **PubMed ID:**26051489 | **CWI** |  |  |
| **49** | **Title:**Two amino acid sequences direct Aspergillus nidulans protein kinase C (PkcA) localization to hyphal apices and septation sites | **PubMed ID:**25724996 | **CWI** |  |  |
| **50** | **Title:**Co-recognition of beta-glucan and chitin and programming of adaptive immunity to Aspergillus fumigatus | **PubMed ID:**25954267 | **CWI** |  |  |
| **51** | **Title:**Kexin-like endoprotease KexB is required for N-glycan processing, morphogenesis and virulence in Aspergillus fumigatus | **PubMed ID:**25687931 | **CWI** |  |  |
| **52** | **Title:**Protein kinase C regulates the expression of cell wall-related genes in RlmA-dependent and independent manners in Aspergillus nidulans | **PubMed ID:**25345444 | **CWI** |  |  |
| **53** | **Title:**Systems Approaches to Predict the Functions of Glycoside Hydrolases during the Life Cycle of Aspergillus niger Using Developmental Mutants Delta brlA and Delta flbA | **PubMed ID:**25629352 | **CWI** |  |  |
| **54** | **Title:**An investigation on tolerance and biosorption potential of Aspergillus awamori ZU JQ 965830.1 TO Cd(II) | **DOI:**10.1007/s13213-014-0838-7 | **heavy metal** |  |  |
| **55** | **Title:**Unfolded protein response is required for Aspergillus oryzae growth under conditions inducing secretory hydrolytic enzyme production | **PubMed ID:**26496881 | **other** |  |  |
| **56** | **Title:**High prevalence of azole resistance in Aspergillus fumigatus isolates from high-risk patients | **PubMed ID:**26163402 | **other** |  |  |
| **57** | **Title:**Genome-Wide Transcriptome Analysis of Cotton (Gossypium hirsutum L.) Identifies Candidate Gene Signatures in Response to Aflatoxin Producing Fungus Aspergillus flavus | **PubMed ID:**26366857 | **other** |  |  |
| **58** | **Title:**Prior in vitro exposure to voriconazole confers resistance to amphotericin B in Aspergillus fumigatus biofilms | **PubMed ID:**25979638 | **other** |  |  |
| **59** | **Title:**Hsp70 and the Cochaperone StiA (Hop) Orchestrate Hsp90-Mediated Caspofungin Tolerance in Aspergillus fumigatus | **PubMed ID:**26014950 | **other** |  |  |
| **60** | **Title:**Calcium signaling mediates antifungal activity of triazole drugs in the Aspergilli | **PubMed ID:**25554700 | **other** |  |  |
| **61** | **Title:**A fungal biofilm reactor based on metal structured packing improves the quality of a Gla::GFP fusion protein produced by Aspergillus oryzae | **PubMed ID:**25935344 | **other** |  |  |
| **62** | **Title:**Structural analysis of novel trehalose-based oligosaccharides from extremely stress-tolerant ascospores of Neosartorya fischeri (Aspergillus fischeri) | **PubMed ID:**25974853 | **other** |  |  |
| **63** | **Title:**Degradation of glutathione in Aspergillus nidulans | **PubMed ID:**26081279 | **other** |  |  |
| **64** | **Title:**Switching from a Unicellular to Multicellular Organization in an Aspergillus niger Hypha | **PubMed ID:**25736883 | **other** |  |  |
| **65** | **Title:**A decrease in bulk water and mannitol and accumulation of trehalose and trehalose-based oligosaccharides define a two-stage maturation process towards extreme stress resistance in ascospores of Neosartorya fischeri (Aspergillus fischeri) | **PubMed ID:**25040022 | **other** |  |  |
| **66** | **Title:**Identification of functional cis-elements required for repression of the Taka-amylase A gene under secretion stress in Aspergillus oryzae | **PubMed ID:**25280730 | **other** |  |  |
| **67** | **Title:**Improvement of superoxide dismutase production by heat shock treatment of Aspergillus niger 26 | **ISSN:**1310-1331 | **other** |  |  |
| **68** | **Title:**Potential roles of WRKY transcription factors in regulating host defense responses during Aspergillus flavus infection of immature maize kernels | **DOI:**10.1016/j.pmpp.2014.11.005 | **other** |  |  |
| **69** | **Title:**Inhibition of ochratoxin A production in Aspergillus carbonarius by hydroxycinnamic acids from grapes | **DOI:**10.3920/WMJ2014.1753 | **other** |  |  |
| **70** | **Title:**Climate change factors and Aspergillus flavus: effects on gene expression, growth and aflatoxin production | **DOI:**10.3920/WMJ2014.1726 | **other** |  |  |
| **71** | **Title:**Calcineurin-Mediated Regulation of Hyphal Growth, Septation, and Virulence in Aspergillus fumigatus | **PubMed ID:**25118871 | **other** |  |  |
| **2014** | **72** | **Title:**Illumina identification of RsrA, a conserved C2H2 transcription factor coordinating the NapA mediated oxidative stress signaling pathway in Aspergillus | **PubMed ID:**25416206 | **oxidative** | **heavy metal** |  |
| **73** | **Title:**ChIP-seq reveals a role for CrzA in the Aspergillus fumigatus high-osmolarity glycerol response (HOG) signalling pathway | **PubMed ID:**25196896 | **oxidative** | **osmotic** |  |
| **74** | **Title:**Perturbations in small molecule synthesis uncovers an iron-responsive secondary metabolite network in Aspergillus fumigatus | **PubMed ID:**25386169 | **oxidative** |  |  |
| **75** | **Title:**Buckwheat achenes antioxidant profile modulates Aspergillus flavus growth and aflatoxin production | **PubMed ID:**25108759 | **oxidative** |  |  |
| **76** | **Title:**A dually located multi-HMG-box protein of Aspergillus nidulans has a crucial role in conidial and ascospore germination | **PubMed ID:**25156107 | **oxidative** |  |  |
| **77** | **Title:**Interplay between proteases and protease inhibitors in the sea fan-Aspergillus pathosystem | **DOI:**10.1007/s00227-014-2499-2 | **oxidative** |  |  |
| **78** | **Title:**Characterization of the Aspergillus fumigatus detoxification systems for reactive nitrogen intermediates and their impact on virulence | **PubMed ID:**25309516 | **oxidative** |  |  |
| **79** | **Title:**A Proteomic Approach to Investigating Gene Cluster Expression and Secondary Metabolite Functionality in Aspergillus fumigatus | **PubMed ID:**25198175 | **oxidative** | **heavy metal** |  |
| **80** | **Title:**Role of Oxidative Stress in Sclerotial Differentiation and Aflatoxin B1 Biosynthesis in Aspergillus flavus | **PubMed ID:**25002424 | **oxidative** |  |  |
| **81** | **Title:**Aflatoxin inhibition in Aspergillus flavus for bioremediation purposes | **DOI:**10.1007/s13213-013-0732-8 | **oxidative** | **osmotic** |  |
| **82** | **Title:**An Antifungal Role of Hydrogen Sulfide on the Postharvest Pathogens Aspergillus niger and Penicillium italicum | **PubMed ID:**25101960 | **oxidative** |  |  |
| **83** | **Title:**Halophilic Aspergillus penicillioides from athalassohaline, thalassohaline, and polyhaline environments | **PubMed ID:**25140168 | **oxidative** | **CWI** |  |
| **84** | **Title:**VeA Is Associated with the Response to Oxidative Stress in the Aflatoxin Producer Aspergillus flavus | **PubMed ID:**24951443 | **oxidative** | **osmotic** |  |
| **85** | **Title:**Ferulic acid released by treatment with Aspergillus oryzae contributes to the cellular antioxidant capacity of wheat germ extract | **DOI:**10.1007/s10068-014-0182-5 | **oxidative** |  |  |
| **86** | **Title:**The Involvement of the Mid1/Cch1/Yvc1 Calcium Channels in Aspergillus fumigatus Virulence | **PubMed ID:**25083783 | **oxidative** | **CWI** |  |
| **87** | **Title:**Effect of low shear modeled microgravity on phenotypic and central chitin metabolism in the filamentous fungi Aspergillus niger and Penicillium chrysogenum | **PubMed ID:**24803238 | **oxidative** | **CWI** |  |
| **88** | **Title:**Cadmium-induced oxidative stress tolerance in cadmium resistant Aspergillus foetidus: its possible role in cadmium bioremediation | **PubMed ID:**24836877 | **oxidative** | **heavy metal** |  |
| **89** | **Title:**The loss of the inducible Aspergillus carbonarius MFS transporter MfsA leads to ochratoxin A overproduction | **PubMed ID:**24791702 | **oxidative** |  |  |
| **90** | **Title:**Molecular mechanisms of Aspergillus flavus secondary metabolism and development | **PubMed ID:**24613992 | **oxidative** |  |  |
| **91** | **Title:**Temperature-stress tolerance of the fungal strain Aspergillus niger 26: physiological and ultrastructural changes | **PubMed ID:**24366816 | **oxidative** |  |  |
| **92** | **Title:**The non-metabolizable glucose analog D-glucal inhibits aflatoxin biosynthesis and promotes kojic acid production in Aspergillus flavus | **PubMed ID:**24742119 | **oxidative** |  |  |
| **93** | **Title:**Effects of Ozone Gas Exposure on Toxigenic Fungi Species from Fusarium, Aspergillus, and Penicillium Genera | **DOI:**10.1080/01919512.2013.846824 | **oxidative** |  |  |
| **94** | **Title:**Mannitol is essential for the development of stress-resistant ascospores in Neosartorya fischeri (Aspergillus fischeri) | **PubMed ID:**24412483 | **oxidative** |  |  |
| **95** | **Title:**Lipids in Aspergillus flavus-maize interaction | **PubMed ID:**24578700 | **oxidative** |  |  |
| **96** | **Title:**Environmental influences on maize-Aspergillus flavus interactions and aflatoxin production | **PubMed ID:**24550905 | **oxidative** |  |  |
| **97** | **Title:**Linkage of Oxidative Stress and Mitochondrial Dysfunctions to Spontaneous Culture Degeneration in Aspergillus nidulans | **PubMed ID:**24345786 | **oxidative** |  |  |
| **98** | **Title:**Fungal siderophore metabolism with a focus on Aspergillus fumigatus | **PubMed ID:**25140791 | **oxidative** |  |  |
| **99** | **Title:**The Aspergillus nidulans ATM Kinase Regulates Mitochondrial Function, Glucose Uptake and the Carbon Starvation Response | **PubMed ID:**24192833 | **oxidative** |  |  |
| **100** | **Title:**Deletion of the putative stretch-activated ion channel Mid1 is hypervirulent in Aspergillus fumigatus | **PubMed ID:**24239700 | **oxidative** | **osmotic** | **CWI** |
| **101** | **Title:**Global Survey of Canonical Aspergillus flavus G Protein-Coupled Receptors | **PubMed ID:**25316696 | **osmotic** |  |  |
| **102** | **Title:**Functional analysis of histone deacetylase and its role in stress response, drug resistance and solid-state cultivation in Aspergillus oryzae | **PubMed ID:**24613105 | **osmotic** | **CWI** |  |
| **103** | **Title:**Abiotic Stress Resistance, a Novel Moonlighting Function of Ribosomal Protein RPL44 in the Halophilic Fungus Aspergillus glaucus | **PubMed ID:**24814782 | **osmotic** | **heavy metal** |  |
| **104** | **Title:**Regulatory mutations affecting sulfur metabolism induce environmental stress response in Aspergillus nidulans | **PubMed ID:**24513272 | **osmotic** |  |  |
| **105** | **Title:**Distinct Septin Heteropolymers Co-Exist during Multicellular Development in the Filamentous Fungus Aspergillus nidulans | **PubMed ID:**24664283 | **osmotic** |  |  |
| **106** | **Title:**Protein Kinase C Overexpression Suppresses Calcineurin-Associated Defects in Aspergillus nidulans and Is Involved in Mitochondrial Function | **PubMed ID:**25153325 | **CWI** |  |  |
| **107** | **Title:**The Aspergillus fumigatus beta-1,3-glucanosyltransferase Gel7 plays a compensatory role in maintaining cell wall integrity under stress conditions | **PubMed ID:**24429506 | **CWI** |  |  |
| **108** | **Title:**Functional analysis of the C-II subgroup killer toxin-like chitinases in the filamentous ascomycete Aspergillus nidulans | **PubMed ID:**24384382 | **CWI** |  |  |
| **109** | **Title:**Polysome profiling reveals broad translatome remodeling during endoplasmic reticulum (ER) stress in the pathogenic fungus Aspergillus fumigatus | **PubMed ID:**24568630 | **CWI** |  |  |
| **110** | **Title:**The putative stress sensor protein MtlA is required for conidia formation, cell wall stress tolerance, and cell wall integrity in Aspergillus nidulans | **PubMed ID:**25036689 | **CWI** |  |  |
| **111** | **Title:**Phosphoinositide 3-kinase delta signaling influences Aspergillus fumigatus-induced allergic lung inflammation by modulating endoplasmic reticulum stress | **ISSN:**0105-4538 | **other** |  |  |
| **112** | **Title:**Diverse and bioactive endophytic Aspergilli inhabit Cupressaceae plant family | **PubMed ID:**24912659 | **other** |  |  |
| **113** | **Title:**Production of Kluyveromyces spp. and environmental tolerance induction against Aspergillus flavus | **DOI:**10.1007/s13213-013-0726-6 | **other** |  |  |
| **114** | **Title:**Aspergillus parasiticus SU-1 Genome Sequence, Predicted Chromosome Structure, and Comparative Gene Expression under Aflatoxin-Inducing Conditions: Evidence that Differential Expression Contributes to Species Phenotype | **PubMed ID:**24951444 | **other** |  |  |
| **115** | **Title:**Aspergillus flavus infection induces transcriptional and physical changes in developing maize kernels | **PubMed ID:**25132833 | **other** |  |  |
| **116** | **Title:**Effect of climate change on Aspergillus flavus and aflatoxin B-1 production | **PubMed ID:**25101060 | **other** |  |  |
| **117** | **Title:**Effects of Dietary Supplementation with Aspergillus Awamori on Growth Performance and Antioxidative Status of Broiler Chickens Exposed to High Ambient Temperature | **DOI:**10.2141/jpsa.0130154 | **other** |  |  |
| **118** | **Title:**A genomic survey of proteases in Aspergilli | **PubMed ID:**24965873 | **other** |  |  |
| **119** | **Title:**Genome-scale analysis of the high-efficient protein secretion system of Aspergillus oryzae | **PubMed ID:**24961398 | **other** |  |  |
| **120** | **Title:**Genetically shaping morphology of the filamentous fungus Aspergillus glaucus for production of antitumor polyketide aspergiolide A | **PubMed ID:**24886193 | **other** |  |  |
| **121** | **Title:**Role of Ozone in UV-C Disinfection, Demonstrated by Comparison between Wild-Type and Mutant Conidia of Aspergillus niger | **PubMed ID:**24283963 | **other** |  |  |
| **122** | **Title:**Trehalose synthesis in Aspergillus niger: characterization of six homologous genes, all with conserved orthologs in related species | **PubMed ID:**24725382 | **other** |  |  |
| **123** | **Title:**Identification of a Key Lysine Residue in Heat Shock Protein 90 Required for Azole and Echinocandin Resistance in Aspergillus fumigatus | **PubMed ID:**24395240 | **other** |  |  |
| **124** | **Title:**Potential involvement of Aspergillus flavus laccases in peanut invasion at low water potential | **DOI:**10.1111/ppa.12088 | **other** |  |  |
| **125** | **Title:**In Vitro Analyses of Mild Heat Stress in Combination with Antifungal Agents against Aspergillus fumigatus Biofilm | **PubMed ID:**24342649 | **other** |  |  |
| **126** | **Title:**Distribution, expression and expansion of Aspergillus fumigatus LINE-like retrotransposon populations in clinical and environmental isolates | **PubMed ID:**24440682 | **other** |  |  |
| **127** | **Title:**Aspergillus penicillioides-a true halophile existing in hypersaline and polyhaline econiches | **DOI:**10.1007/s13213-013-0646-5 | **other** |  |  |
| **128** | **Title:**The fungal UPR A regulatory hub for virulence traits in the mold pathogen Aspergillus fumigatus | **PubMed ID:**24189125 | **other** |  |  |
| **129** | **Title:**Production of quercetin, kaempferol and their glycosidic derivatives from the aqueous-organic extracted residue of litchi pericarp with Aspergillus awamori | **PubMed ID:**24128471 | **other** |  |  |
| **130** | **Title:**Dissimilatory nitrate reduction by Aspergillus terreus isolated from the seasonal oxygen minimum zone in the Arabian Sea | **PubMed ID:**24517718 | **other** |  |  |
| **131** | **Title:**Relationship Between Morphology and Itaconic Acid Production by Aspergillus terreus | **PubMed ID:**24169454 | **other** |  |  |
| **132** | **Title:**Endophytes Aspergillus caespitosus LK12 and Phoma sp. LK13 of Moringa peregrina produce gibberellins and improve rice plant growth | **DOI:**10.1080/17429145.2014.917384 | **other** |  |  |
| **133** | **Title:**Influence of Aspergillus niger stress on antimicrobial and biochemical profiling of Cichorium intybus | **ISSN:**0209-4541 | **other** |  |  |
| **2013** | **134** | **Title:**Proteomic alterations induced by ionic liquids in Aspergillus nidulans and Neurospora crassa | **PubMed ID:**24120530 | **oxidative** |  |  |
| **135** | **Title:**Increase of Fumonisin B-2 and Ochratoxin A Production by Black Aspergillus Species and Oxidative Stress in Grape Berries Damaged by Powdery Mildew | **PubMed ID:**24290677 | **oxidative** |  |  |
| **136** | **Title:**Characterization and disruption of the cipC gene in the ochratoxigenic fungus Aspergillus carbonarius | **DOI:**10.1016/j.foodres.2013.08.008 | **oxidative** |  |  |
| **137** | Extensive proteomic remodeling is induced by eukaryotic translation elongation factor 1B gamma deletion in Aspergillus fumigatus | **PubMed ID:**24023013 | **oxidative** |  |  |
| **138** | **Title:**Antifungal activity of Ferulago capillaris essential oil against Candida, Cryptococcus, Aspergillus and dermatophyte species | **PubMed ID:**23619574 | **oxidative** |  |  |
| **139** | **Title:**Biochemical characterization of a lead-tolerant strain of Aspergillus foetidus: An implication of bioremediation of lead from liquid media | **DOI:**10.1016/j.ibiod.2012.05.031 | **oxidative** |  |  |
| **140** | **Title:**Autophagy promotes survival in aging submerged cultures of the filamentous fungus Aspergillus niger | **PubMed ID:**23700238 | **oxidative** |  |  |
| **141** | **Title:**Woronin bodies, their impact on stress resistance and virulence of the pathogenic mould Aspergillus fumigatus and their anchoring at the septal pore of filamentous Ascomycota | **PubMed ID:**23869404 | **oxidative** | **osmotic** |  |
| **142** | **Title:**Genotypic and Phenotypic Versatility of Aspergillus flavus during Maize Exploitation | **PubMed ID:**23894339 | **oxidative** |  |  |
| **143** | **Title:**Differences in the Regulation of Ochratoxin A by the HOG Pathway in Penicillium and Aspergillus in Response to High Osmolar Environments | **PubMed ID:**23877195 | **oxidative** | **osmotic** | **CWI** |
| **144** | **Title:**Disparate Proteome Responses of Pathogenic and Nonpathogenic Aspergilli to Human Serum Measured by Activity-Based Protein Profiling (ABPP) | **PubMed ID:**23599423 | **oxidative** | **CWI** |  |
| **145** | **Title:**Oxidative Stress in Experimental Rodent Corneas Infected With Aflatoxigenic and Nonaflatoxigenic Aspergillus flavus | **PubMed ID:**23538624 | **oxidative** |  |  |
| **146** | **Title:**RsmA Regulates Aspergillus fumigatus Gliotoxin Cluster Metabolites Including Cyclo(L-Phe-L-Ser), a Potential New Diagnostic Marker for Invasive Aspergillosis | **PubMed ID:**23671611 | **oxidative** |  |  |
| **147** | **Title:**Light Sensing in Aspergillus fumigatus Highlights the Case for Establishing New Models for Fungal Photobiology | **PubMed ID:**23631920 | **oxidative** | **CWI** |  |
| **148** | **Title:**Effect of cell wall integrity stress and RlmA transcription factor on asexual development and autolysis in Aspergillus nidulans | **PubMed ID:**23485399 | **oxidative** | **CWI** |  |
| **149** | **Title:**Effects of a Defective Endoplasmic Reticulum-Associated Degradation Pathway on the Stress Response, Virulence, and Antifungal Drug Susceptibility of the Mold Pathogen Aspergillus fumigatus | **PubMed ID:**23355008 | **oxidative** | **CWI** |  |
| **150** | **Title:**LAMMER Kinase LkhA Plays Multiple Roles in the Vegetative Growth and Asexual and Sexual Development of Aspergillus nidulans | **PubMed ID:**23516554 | **oxidative** |  |  |
| **151** | **Title:**Receptor-mediated signaling in Aspergillus fumigatus | **PubMed ID:**23430083 | **oxidative** | **CWI** |  |
| **152** | **Title:**Current Understanding of HOG-MAPK Pathway in Aspergillus fumigatus | **PubMed ID:**23161019 | **oxidative** | **osmotic** |  |
| **153** | **Title:**Evidence that a transcription factor regulatory network coordinates oxidative stress response and secondary metabolism in aspergilli | **PubMed ID:**23281343 | **oxidative** |  |  |
| **154** | **Title:**Effects of U0126 on growth and activation of mitogen-activated protein kinases in Aspergillus fumigatus | **PubMed ID:**23324267 | **oxidative** |  |  |
| **155** | **Title:**The Immune Interplay between the Host and the Pathogen in Aspergillus fumigatus Lung Infection | **PubMed ID:**23984400 | **oxidative** |  |  |
| **156** | **Title:**bZIP transcription factors affecting secondary metabolism, sexual development and stress responses in Aspergillus nidulans | **PubMed ID:**23154967 | **oxidative** |  |  |
| **157** | **Title:**Transcriptome changes initiated by carbon starvation in Aspergillus nidulans | **PubMed ID:**23154970 | **oxidative** |  |  |
| **158** | **Title:**Evaluation for Rock Phosphate Solubilization in Fermentation and Soil-Plant System Using A Stress-Tolerant Phosphate-Solubilizing Aspergillus niger WHAK1 | **PubMed ID:**23229476 | **oxidative** |  |  |
| **159** | **Title:**NikA/TcsC Histidine Kinase Is Involved in Conidiation, Hyphal Morphology, and Responses to Osmotic Stress and Antifungal Chemicals in Aspergillus fumigatus | **PubMed ID:**24312504 | **osmotic** | **CWI** |  |
| **160** | **Title:**Effect of phenylpyrrole-resistance on fitness parameters and ochratoxin production in Aspergillus carbonarius | **PubMed ID:**23800740 | **osmotic** |  |  |
| **161** | **Title:**Role of the Zinc Finger Transcription Factor SltA in Morphogenesis and Sterigmatocystin Biosynthesis in the Fungus Aspergillus nidulans | **PubMed ID:**23840895 | **osmotic** |  |  |
| **162** | **Title:**Sensitivity of Aspergillus nidulans to the Cellulose Synthase Inhibitor Dichlobenil: Insights from Wall-Related Genes' Expression and Ultrastructural Hyphal Morphologies | **PubMed ID:**24312197 | **CWI** |  |  |
| **163** | **Title:**The Transcriptional Repressor TupA in Aspergillus niger Is Involved in Controlling Gene Expression Related to Cell Wall Biosynthesis, Development, and Nitrogen Source Availability | **PubMed ID:**24205111 | **CWI** |  |  |
| **164** | Title: Transcriptomic and morphological profiling of Aspergillus fumigatus Af293 in response to antifungal activity produced by Lactobacillus plantarum 16Development, and Nitrogen Source Availability | **PubMed ID:**23876797 | **CWI** |  |  |
| **165** | **Title:**Aspergillus oryzae AoSO Is a Novel Component of Stress Granules upon Heat Stress in Filamentous Fungi | **PubMed ID:**23991062 | **CWI** |  |  |
| **166** | **Title:**N-Glycosylation of Gel1 or Gel2 is vital for cell wall beta-glucan synthesis in Aspergillus fumigatus | **PubMed ID:**23650256 | **CWI** |  |  |
| **167** | **Title:**Transcriptome and Biochemical Analysis Reveals That Suppression of GPI-Anchor Synthesis Leads to Autophagy and Possible Necroptosis in Aspergillus fumigatus | **PubMed ID:**23527074 | **CWI** |  |  |
| **168** | **Title:**Functional Analysis of the Aspergillus nidulans Kinome | **PubMed ID:**23505451 | **CWI** |  |  |
| **169** | **Title:**Functional Characterization of Aspergillus nidulans ypkA, a Homologue of the Mammalian Kinase SGK | **PubMed ID:**23472095 | **CWI** |  |  |
| **170** | **Title:**Role of the Guanine Nucleotide Exchange Factor Rom2 in Cell Wall Integrity Maintenance of Aspergillus fumigatus | **PubMed ID:**23264643 | **CWI** |  |  |
| **171** | **Title:**Aspergillus fumigatus melanins: interference with the host endocytosis pathway and impact on virulence | **PubMed ID:**23346079 | **CWI** |  |  |
| **172** | **Title:**A Possible Role of Aspergillus niger Mitochondrial Cytochrome c in Malachite Green Reduction Under Calcium Chloride Stress | **PubMed ID:**23737340 | **other** |  |  |
| **173** | **Title:**Laccases Involved in 1,8-Dihydroxynaphthalene Melanin Biosynthesis in Aspergillus fumigatus Are Regulated by Developmental Factors and Copper Homeostasis | **PubMed ID:**24123270 | **other** |  |  |
| **174** | **Title:**Amphotericin-resistant Aspergillus terreus isolates exhibit a higher adaption to cellular stress | **ISSN:**0933-7407 | **other** |  |  |
| **175** | **Title:**Investigation of Malic Acid Production in Aspergillus oryzae under Nitrogen Starvation Conditions | **PubMed ID:**23892740 | **other** |  |  |
| **176** | **Title:**Comparison of growth, nutritional utilisation patterns, and niche overlap indices of toxigenic and atoxigenic Aspergillus flavus strains | **PubMed ID:**24012304 | **other** |  |  |
| **177** | **Title:**Comparison and Analysis of the Genomes of Two Aspergillus oryzae Strains | **PubMed ID:**23889147 | **other** |  |  |
| **178** | **Title:**Effect of Kluyveromyces thermotolerans on polyketide synthase gene expression and ochratoxin accumulation by Penicillium and Aspergillus | **DOI:**10.3920/WMJ2012.1532 | **other** |  |  |
| **179** | **Title:**Phospho-regulation and nucleocytoplasmic trafficking of CrzA in response to calcium and alkaline-pH stress in Aspergillus nidulans | **PubMed ID:**23772954 | **other** |  |  |
| **180** | **Title:**conF and conJ contribute to conidia germination and stress response in the filamentous fungus Aspergillus nidulans | **PubMed ID:**23644150 | **other** |  |  |
| **181** | **Title:**Genetic Bypass of Aspergillus nidulans crzA Function in Calcium Homeostasis | **PubMed ID:**23665873 | **other** |  |  |
| **182** | **Title:**The Aspergillus nidulans Peripheral ER: Disorganization by ER Stress and Persistence during Mitosis | **PubMed ID:**23826221 | **other** |  |  |
| **183** | **Title:**Deletion of the sec4 Homolog srgA from Aspergillus fumigatus Is Associated with an Impaired Stress Response, Attenuated Virulence and Phenotypic Heterogeneity | **PubMed ID:**23785510 | **other** |  |  |
| **184** | **Title:**The Spt-Ada-Gcn5 Acetyltransferase (SAGA) Complex in Aspergillus nidulans | **PubMed ID:**23762321 | **other** |  |  |
| **185** | **Title:**Molecular Genetic Characterization of the Biosynthesis Cluster of a Prenylated Isoindolinone Alkaloid Aspernidine A in Aspergillus nidulans | **PubMed ID:**23706169 | **other** |  |  |
| **186** | **Title:**Modelling the activation of alkaline pH response transcription factor PacC in Aspergillus nidulans: Involvement of a negative feedback loop | **PubMed ID:**23458440 | **other** |  |  |
| **187** | **Title:**Pathway of Glycine Betaine Biosynthesis in Aspergillus fumigatus | **PubMed ID:**23563483 | **other** |  |  |
| **188** | **Title:**Identification of regulatory elements in the glucoamylase-encoding gene (glaB) promoter from Aspergillus oryzae | **PubMed ID:**23224588 | **other** |  |  |
| **189** | **Title:**Aspergillus nidulans translationally controlled tumor protein has a role in the balance between asexual and sexual differentiation and normal hyphal branching | **PubMed ID:**23480775 | **other** |  |  |
| **190** | **Title:**Transcriptomic Insights into the Oxidative Response of Stress-Exposed Aspergillus fumigatus | **PubMed ID:**23278536 | **other** |  |  |
| **191** | **Title:**Identification of Metabolic Pathways Influenced by the G-Protein Coupled in Aspergillus nidulans | **PubMed ID:**23658706 | **other** |  |  |
| **192** | **Title:**pyrG is required for maintaining stable cellular uracil level and normal sporulation pattern under excess uracil stress in Aspergillus nidulans | **PubMed ID:**23633078 | **other** |  |  |
| **193** | **Title:**Azole resistant Aspergillus fumigatus: An emerging problem | PubMed ID: 23562488 | **other** |  |  |
| **194** | **Title:**Biochemical and Biophysical Response to Calcium Chloride Stress in Aspergillus niger and its Role in Malachite Green Degradation | **PubMed ID:**23076635 | **other** |  |  |
| **195** | **Title:**Modelling colony population growth in the filamentous fungus Aspergillus nidulans | **PubMed ID:**23246716 | **other** |  |  |
| **196** | **Title:**The Fungal Pathogen Aspergillus fumigatus Regulates Growth, Metabolism, and Stress Resistance in Response to Light | **PubMed ID:**23532976 | **other** |  |  |
| **197** | **Title:**Characterization of the major Woronin body protein HexA of the human pathogenic mold Aspergillus fumigatus | **PubMed ID:**23332467 | **other** |  |  |
| **198** | **Title:**Extracellular DNA Release Acts as an Antifungal Resistance Mechanism in Mature Aspergillus fumigatus Biofilms | **PubMed ID:**23314962 | **other** |  |  |
| **199** | **Title:**Intracellular trehalase activity is required for development, germination and heat-stress resistance of Aspergillus niger conidia | **PubMed ID:**23116628 | **other** |  |  |
| **200** | **Title:**Transcriptional Changes in the Transition from Vegetative Cells to Asexual Development in the Model Fungus Aspergillus nidulans | **PubMed ID:**23264642 | **other** |  |  |
| **201** | **Title:**Ergosterol biosynthesis in Aspergillus fumigatus: its relevance as an antifungal target and role in antifungal drug resistance | **PubMed ID:**23335918 | **other** |  |  |
| **202** | **Title:**In vitro and in vivo role of heat shock protein 90 in Amphotericin B resistance of Aspergillus terreus | **PubMed ID:**22515428 | **other** |  |  |
| **2012** | **203** | **Title:**Involvement of Protein Kinase C in the Suppression of Apoptosis and in Polarity Establishment in Aspergillus nidulans under Conditions of Heat Stress | **PubMed ID:**23209763 | **oxidative** | **osmotic** | **CWI** |
| **204** | **Title:**Characterization of the velvet regulators in Aspergillus fumigatus | **PubMed ID:**22970834 | **oxidative** |  |  |
| **205** | **Title:**How Peroxisomes Affect Aflatoxin Biosynthesis in Aspergillus Flavus | **PubMed ID:**23094106 | **oxidative** |  |  |
| **206** | **Title:**The Aspergillus fumigatus Protein GliK Protects against Oxidative Stress and Is Essential for Gliotoxin Biosynthesis | **PubMed ID:**22903976 | **oxidative** |  |  |
| **207** | **Title:**Aoyap1 regulates OTA synthesis by controlling cell redox balance in Aspergillus ochraceus | **PubMed ID:**22410746 | **oxidative** |  |  |
| **208** | **Title:**Genome-wide expression analysis upon constitutive activation of the HacA bZIP transcription factor in Aspergillus niger reveals a coordinated cellular response to counteract ER stress | **PubMed ID:**22846479 | **oxidative** |  |  |
| **209** | **Title:**Proteome analysis of the farnesol-induced stress response in Aspergillus nidulans-The role of a putative dehydrin | **PubMed ID:**22634043 | **oxidative** | **osmotic** |  |
| **210** | **Title:**GmcA Is a Putative Glucose-Methanol-Choline Oxidoreductase Required for the Induction of Asexual Development in Aspergillus nidulans | **PubMed ID:**22792266 | **oxidative** | **osmotic** |  |
| **211** | **Title:**The anisin1 gene encodes a defensin-like protein and supports the fitness of Aspergillus nidulans | **PubMed ID:**22113351 | **oxidative** |  |  |
| **212** | **Title:**Nonribosomal Peptide Synthetase Genes pesL and pes1 Are Essential for Fumigaclavine C Production in Aspergillus fumigatus | **PubMed ID:**22344643 | **oxidative** |  |  |
| **213** | **Title:**Development stage-specific proteomic profiling uncovers small, lineage specific proteins most abundant in the Aspergillus Fumigatus conidial proteome | **PubMed ID:**22545825 | **oxidative** | **CWI** |  |
| **214** | **Title:**Transcriptional and Proteomic Analysis of the Aspergillus fumigatus Delta prtT Protease-Deficient Mutant | **PubMed ID:**22514608 | **oxidative** |  |  |
| **215** | **Title:**Initial Proteome Analysis of Caffeine-Induced Proteins in Aspergillus tamarii Using Two-Dimensional Fluorescence Difference Gel Electrophoresis | **PubMed ID:**22391696 | **oxidative** |  |  |
| **216** | **Title:**Aspergillus fumigatus mitochondrial electron transport chain mediates oxidative stress homeostasis, hypoxia responses and fungal pathogenesis | **PubMed ID:**22443190 | **oxidative** |  |  |
| **217** | **Title:**Molecular Characterization of the Putative Transcription Factor SebA Involved in Virulence in Aspergillus fumigatus | **PubMed ID:**22345349 | **oxidative** | **CWI** |  |
| **218** | **Title:**Visual expression analysis of the responses of the alternative oxidase gene (aox1) to heat shock, oxidative, and osmotic stresses in conidia of citric acid-producing Aspergillus niger | **PubMed ID:**22138384 | **oxidative** | **CWI** |  |
| **219** | **Title:**A novel dehydrin-like protein from Aspergillus fumigatus regulates freezing tolerance | **PubMed ID:**22306917 | **oxidative** | **osmotic** |  |
| **220** | **Title:**An Aspergillus nidulans bZIP response pathway hardwired for defensive secondary metabolism operates through aflR | **PubMed ID:**22283524 | **oxidative** |  |  |
| **221** | **Title:**Mevalonate governs interdependency of ergosterol and siderophore biosyntheses in the fungal pathogen Aspergillus fumigatus | **PubMed ID:**22106303 | **oxidative** |  |  |
| **222** | **Title:**Proteomic and Biochemical Evidence Support a Role for Transport Vesicles and Endosomes in Stress Response and Secondary Metabolism in Aspergillus parasiticus | **PubMed ID:**22103394 | **oxidative** | **osmotic** |  |
| **223** | **Title:**Cholic acid changes defense response to oxidative stress in soybean induced by Aspergillus niger | **DOI:**10.2478/s11535-011-0104-y | **oxidative** |  |  |
| **224** | **Title:**Heme-Biosynthetic Porphobilinogen Deaminase Protects Aspergillus nidulans from Nitrosative Stress | **PubMed ID:**22038601 | **oxidative** |  |  |
| **225** | **Title:**Putative Calcium Channels CchA and MidA Play the Important Roles in Conidiation, Hyphal Polarity and Cell Wall Components in Aspergillus nidulans | **PubMed ID:**23071589 | **osmotic** | **CWI** |  |
| **226** | **Title:**Studies on two proteins that influence the stress resistance of the pathogenic mold Aspergillus fumigatus: The two-component histidine kinase TcsC and HexA, a major constituent of Woronin bodies | **ISSN:**0933-7407 | **osmotic** |  |  |
| **227** | **Title:**Microcolony Imaging of Aspergillus fumigatus Treated with Echinocandins Reveals Both Fungistatic and Fungicidal Activities | **PubMed ID:**22536390 | **osmotic** | **CWI** |  |
| **228** | **Title:**Vacuolar H+-ATPase plays a key role in cell wall biosynthesis of Aspergillus niger | **PubMed ID:**22222772 | **osmotic** | **CWI** |  |
| **229** | **Title:**Heat Shock Protein 90 Is Required for Conidiation and Cell Wall Integrity in Aspergillus fumigatus | **PubMed ID:**22822234 | **CWI** |  |  |
| **230** | **Title:**HOG-MAPK Signaling Regulates the Adaptive Responses of Aspergillus fumigatus to Thermal Stress and Other Related Stress | **PubMed ID:**22678624 | **CWI** |  |  |
| **231** | **Title:**The echinocandin B producer fungus Aspergillus nidulans var. roseus ATCC 58397 does not possess innate resistance against its lipopeptide antimycotic | **PubMed ID:**22555909 | **CWI** |  |  |
| **232** | **Title:**Deciphering cell wall integrity signalling in Aspergillus fumigatus: identification and functional characterization of cell wall stress sensors and relevant Rho GTPases | **PubMed ID:**22220813 | **CWI** |  |  |
| **233** | **Title:**The transcriptomic fingerprint of glucoamylase over-expression in Aspergillus niger | **PubMed ID:**23237452 | **other** |  |  |
| **234** | **Title:**Dsc Orthologs Are Required for Hypoxia Adaptation, Triazole Drug Responses, and Fungal Virulence in Aspergillus fumigatus | **PubMed ID:**23104569 | **other** |  |  |
| **235** | **Title:**An Integrated Control Strategy for the Fermentation of the Marine-Derived Fungus Aspergillus glaucus for the Production of Anti-cancer Polyketide | **PubMed ID:**22286337 | **other** |  |  |
| **236** | **Title:**NosA, a transcription factor important in Aspergillus fumigatus stress and developmental response, rescues the germination defect of a laeA deletion | **PubMed ID:**23022264 | **other** |  |  |
| **237** | **Title:**Identifying cotton (Gossypium hirsutum L.) genes induced in response to Aspergillus flavus infection | PubMed ID: 26366857 | **other** |  |  |
| **238** | **Title:**Multiplexed Activity-based Protein Profiling of the Human Pathogen Aspergillus fumigatus Reveals Large Functional Changes upon Exposure to Human Serum | **PubMed ID:**22865858 | **other** |  |  |
| **239** | **Title:**The Role, Interaction and Regulation of the Velvet Regulator VelB in Aspergillus nidulans | **PubMed ID:**23049895 | **other** |  |  |
| **240** | **Title:**Aspergillus fumigatus calcineurin interacts with a nucleoside diphosphate kinase | **PubMed ID:**22634424 | **other** |  |  |
| **241** | **Title:**Analysis of Promoter Function in Aspergillus fumigatus | **PubMed ID:**22843562 | **other** |  |  |
| **242** | **Title:**The Two-Component Sensor Kinase TcsC and Its Role in Stress Resistance of the Human-Pathogenic Mold Aspergillus fumigatus | **PubMed ID:**22675534 | **other** |  |  |
| **243** | **Title:**Comparison of temperature and moisture requirements for sporulation of Aspergillus flavus sclerotia on natural and artificial substrates | **PubMed ID:**22658309 | **other** |  |  |
| **244** | **Title:**HOG-MAPK signaling regulates the adaptive responses of Aspergillus fumigatus to environmental stresses | **ISSN:**0933-7407 | **other** |  |  |
| **245** | **Title:**Aspergillus fumigatus counteracts nitric oxide stress | **ISSN:**0933-7407 | **other** |  |  |
| **246** | **Title:**Proteomic Characterization of Aspergillus fumigatus Treated with an Antifungal Coumarin for Identification of Novel Target Molecules of Key Pathways | **PubMed ID:**22533410 | **other** |  |  |
| **247** | **Title:**Effect of a Cultures of Aspergillus oryzae on Inflammatory Response and mRNA Expression in Intestinal Immune-Related Mediators of Male Broiler Chicks | **DOI:**10.2141/jpsa.011079 | **other** |  |  |
| **248** | **Title:**Effect of Aspergillus oryzae-Challenged Germination on Soybean Isoflavone Content and Antioxidant Activity | **PubMed ID:**22409158 | **other** |  |  |
| **249** | **Title:**Influence of sub-lethal antioxidant doses, water potential and temperature on growth, sclerotia, aflatoxins and aflD (=nor-1) expression by Aspergillus flavus RCP08108 | **PubMed ID:**22227105 | **other** |  |  |
| **250** | **Title:**Conserved and specific responses to hypoxia in Aspergillus oryzae and Aspergillus nidulans determined by comparative transcriptomics | **PubMed ID:**22170104 | **other** |  |  |
| **251** | **Title:**Global Transcriptome Changes Underlying Colony Growth in the Opportunistic Human Pathogen Aspergillus fumigatus | **PubMed ID:**21724936 | **other** |  |  |
| **252** | **Title:**Deciphering metabolic traits of the fungal pathogen Aspergillus fumigatus: redundancy vs. essentiality | **PubMed ID:**23264772 | **other** |  |  |
| **2011** | **253** | **Title:**Dexamethasone increases susceptibility of Aspergillus fumigatus to hydrogen peroxide via down-regulation of Afyap1 gene expression in vitro | **PubMed ID:**22340240 | **oxidative** |  |  |
| **254** | **Title:**The Role of sho1 in Polarized Growth of Aspergillus fumigatus | **PubMed ID:**21796487 | **oxidative** | **osmotic** | **CWI** |
| **255** | **Title:**The metalloreductase FreB is involved in adaptation of Aspergillus fumigatus to iron starvation | **PubMed ID:**21840411 | **oxidative** |  |  |
| **256** | **Title:**Osmotic stabilizer-coupled suppression of NDR defects is dependent on the calcium-calcineurin signaling cascade in Aspergillus nidulans | **PubMed ID:**21741477 | **oxidative** | **osmotic** |  |
| **257** | **Title:**Stress-related Transcription Factor AtfB Integrates Secondary Metabolism with Oxidative Stress Response in Aspergilli | **PubMed ID:**21808056 | **oxidative** |  |  |
| **258** | **Title:**Simultaneous Enhancement of Free Isoflavone Content and Antioxidant Potential of Soybean by Fermentation with Aspergillus oryzae | **PubMed ID:**22417591 | **oxidative** |  |  |
| **259** | **Title:**Farnesol-induced cell death in the filamentous fungus Aspergillus nidulans | **PubMed ID:**21936849 | **oxidative** |  |  |
| **260** | **Title:**The MAP kinase MpkA controls cell wall integrity, oxidative stress response, gliotoxin production and iron adaptation in Aspergillus fumigatus | **PubMed ID:**21883519 | **oxidative** | **CWI** |  |
| **261** | **Title:**Targeted Disruption of Nonribosomal Peptide Synthetase pes3 Augments the Virulence of Aspergillus fumigatus | **PubMed ID:**21746855 | **oxidative** |  |  |
| **262** | **Title:**Mushrooms versus fungi: natural compounds from Lentinula edodes inhibit aflatoxin biosynthesis by Aspergillus parasiticus | **DOI:**10.3920/WMJ2010.1270 | **oxidative** |  |  |
| **263** | **Title:**Direct effects of non-antifungal agents used in cancer chemotherapy and organ transplantation on the development and virulence of Candida and Aspergillus species | **PubMed ID:**21701255 | **oxidative** |  |  |
| **264** | **Title:**Asperlin From the Marine-Derived Fungus Aspergillus sp SF-5044 Exerts Anti-inflammatory Effects Through Heme Oxygenase-1 Expression in Murine Macrophages | **PubMed ID:**21705844 | **oxidative** |  |  |
| **265** | **Title:**Repression of N-glycosylation triggers the unfolded protein response (UPR) and overexpression of cell wall protein and chitin in Aspergillus fumigatus | **PubMed ID:**21527474 | **oxidative** | **CWI** |  |
| **266** | **Title:**SidL, an Aspergillus fumigatus Transacetylase Involved in Biosynthesis of the Siderophores Ferricrocin and Hydroxyferricrocin | **PubMed ID:**21622789 | **oxidative** |  |  |
| **267** | **Title:**Proteome analysis of the fungus Aspergillus carbonarius under ochratoxin A producing conditions | **PubMed ID:**21531034 | **oxidative** |  |  |
| **268** | **Title:**Identification of virulence determinants of the human pathogenic fungi Aspergillus fumigatus and Candida albicans by proteomics | **PubMed ID:**21565549 | **oxidative** |  |  |
| **269** | **Title:**Shaping the fungal adaptome - Stress responses of Aspergillus fumigatus | **PubMed ID:**21565548 | **oxidative** |  |  |
| **270** | **Title:**The roles of the alternative NADH dehydrogenases during oxidative stress in cultures of the filamentous fungus Aspergillus niger | **PubMed ID:**21530918 | **oxidative** |  |  |
| **271** | **Title:**Aspergillus nidulans transcription factor AtfA interacts with the MAPK SakA to regulate general stress responses, development and spore functions | **PubMed ID:**21320182 | **oxidative** | **osmotic** |  |
| **272** | **Title:**Enzymes of mannitol metabolism in the human pathogenic fungus Aspergillus fumigatus - kinetic properties of mannitol-1-phosphate 5-dehydrogenase and mannitol 2-dehydrogenase, and their physiological implications | **PubMed ID:**21299839 | **oxidative** |  |  |
| **273** | **Title:**Characterization of the conserved phosphorylation site in the Aspergillus nidulans response regulator SrrA | **PubMed ID:**21229249 | **oxidative** | **osmotic** | **CWI** |
| **274** | **Title:**Elucidation of Functional Markers from Aspergillus nidulans Developmental Regulator FlbB and Their Phylogenetic Distribution | **PubMed ID:**21423749 | **oxidative** |  |  |
| **275** | **Title:**Functional analysis and subcellular location of two flavohemoglobins from Aspergillus oryzae | **PubMed ID:**20817113 | **oxidative** |  |  |
| **276** | **Title:**The Temporal Dynamics of Differential Gene Expression in Aspergillus fumigatus Interacting with Human Immature Dendritic Cells In Vitro | **PubMed ID:**21264256 | **oxidative** | **osmotic** | **CWI** |
| **277** | **Title:**Loss of msnA, a Putative Stress Regulatory Gene, in Aspergillus parasiticus and Aspergillus flavus Increased Production of Conidia, Aflatoxins and Kojic Acid | **PubMed ID:**22069691 | **oxidative** |  |  |
| **278** | **Title:**Putative Stress Sensors WscA and WscB Are Involved in Hypo-Osmotic and Acidic pH Stress Tolerance in Aspergillus nidulans | **PubMed ID:**21926329 | **osmotic** | **CWI** |  |
| **279** | **Title:**Morphology engineering - Osmolality and its effect on Aspergillus niger morphology and productivity | **PubMed ID:**21801352 | **osmotic** | **CWI** |  |
| **280** | **Title:**Analysis of the Aspergillus fumigatus Proteome Reveals Metabolic Changes and the Activation of the Pseurotin A Biosynthesis Gene Cluster in Response to Hypoxia | **PubMed ID:**21388144 | **osmotic** |  |  |
| **281** | **Title:**8-Carbon oxylipins inhibit germination and growth, and stimulate aerial conidiation in Aspergillus nidulans | **PubMed ID:**21530921 | **osmotic** |  |  |
| **282** | **Title:**Impact of a Streptomyces (AS1) strain and its metabolites on control of Aspergillus flavus and aflatoxin B-1 contamination in vitro and in stored peanuts | **DOI:**10.1080/09583157.2011.632078 | **osmotic** |  |  |
| **283** | **Title:**Roles of the His-Asp Phosphorelay Signal Transduction System in Controlling Cell Growth and Development in Aspergillus nidulans | **PubMed ID:**21228462 | **osmotic** |  |  |
| **284** | **Title:**The virulence of the opportunistic fungal pathogen Aspergillus fumigatus requires cooperation between the endoplasmic reticulum-associated degradation pathway (ERAD) and the unfolded protein response (UPR) | **PubMed ID:**21217201 | **osmotic** |  |  |
| **285** | **Title:**Localization and activity of the calcineurin catalytic and regulatory subunit complex at the septum is essential for hyphal elongation and proper septation in Aspergillus fumigatus | **PubMed ID:**22066998 | **CWI** |  |  |
| **286** | **Title:**HacA-Independent Functions of the ER Stress Sensor IreA Synergize with the Canonical UPR to Influence Virulence Traits in Aspergillus fumigatus | **PubMed ID:**22028661 | **CWI** |  |  |
| **287** | **Title:**The chitin synthase genes chsA and chsC are not required for cell wall stress responses in the human pathogen Aspergillus fumigatus | **PubMed ID:**21763289 | **CWI** |  |  |
| **288** | **Title:**beta-1,3-Glucan-Induced Host Phospholipase D Activation Is Involved in Aspergillus fumigatus Internalization into Type II Human Pneumocyte A549 Cells | **PubMed ID:**21760893 | **CWI** |  |  |
| **289** | **Title:**AbaA and WetA govern distinct stages of Aspergillus fumigatus development | **PubMed ID:**20966095 | **CWI** |  |  |
| **290** | **Title:**Divergent Protein Kinase A isoforms co-ordinately regulate conidial germination, carbohydrate metabolism and virulence in Aspergillus fumigatus | **PubMed ID:**21210869 | **CWI** |  |  |
| **291** | **Title:**Impact of the Lectin Chaperone Calnexin on the Stress Response, Virulence and Proteolytic Secretome of the Fungal Pathogen Aspergillus fumigatus | **PubMed ID:**22163332 | **other** |  |  |
| **292** | **Title:**Isolation and characterization of self-fertile suppressors from the sterile nsdD deletion mutant of Aspergillus nidulans | **PubMed ID:**22203574 | **other** |  |  |
| **293** | **Title:**A carrier fusion significantly induces unfolded protein response in heterologous protein production by Aspergillus oryzae | **PubMed ID:**21822643 | **other** |  |  |
| **294** | **Title:**Influence of Agitation Speed on Tannase Production and Morphology of Aspergillus niger FETL FT3 in Submerged Fermentation | **PubMed ID:**21947762 | **other** |  |  |
| **295** | **Title:**Berberine and Itraconazole Are not Synergistic in Vitro against Aspergillus fumigatus Isolated from Clinical Patients | **DOI:**10.3390/molecules16119218 | **other** |  |  |
| **296** | **Title:**Interrogation of Related Clinical Pan-Azole-Resistant Aspergillus fumigatus Strains: G138C, Y431C, and G434C Single Nucleotide Polymorphisms in cyp51A, Upregulation of cyp51A, and Integration and Activation of Transposon Atf1 in the cyp51A Promoter | **PubMed ID:**21876055 | **other** |  |  |
| **297** | **Title:**Assessment of Aspergillus niger biofilm growth kinetics in minibioreactors by carbon dioxide evolution | **ISSN:**1684-5315 | **other** |  |  |
| **298** | **Title:**The HexA protein of Aspergillus fumigatus and its role in stress resistance and virulence | **ISSN:**1438-4221 | **other** |  |  |
| **299** | **Title:**Dual transcriptional profiling of a bacterial/fungal confrontation: Collimonas fungivorans versus Aspergillus niger | **PubMed ID:**21614084 | **other** |  |  |
| **300** | **Title:**Role of Nitric Oxide and Flavohemoglobin Homolog Genes in Aspergillus nidulans Sexual Development and Mycotoxin Production | **PubMed ID:**21642398 | **other** |  |  |
| **301** | **Title:**Proteomics of eukaryotic microorganisms: The medically and biotechnologically important fungal genus Aspergillus | **PubMed ID:**21726053 | **other** |  |  |
| **302** | **Title:**Development of a model describing the effect of temperature, water activity and (gel) structure on growth and ochratoxin A production by Aspergillus carbonarius in vitro and evaluation in food matrices of different viscosity | **PubMed ID:**21511133 | **other** |  |  |
| **303** | **Title:**The MpkB MAP Kinase Plays a Role in Post-karyogamy Processes as well as in Hyphal Anastomosis During Sexual Development in Aspergillus nidulans | **PubMed ID:**21717328 | **other** |  |  |
| **304** | **Title:**Effects of sub-lethal food grade antioxidant doses and environmental stressors on growth, sclerotia, aflatoxins and aflD (nor-1) expression by Aspergillus parasiticus RCP08300 | **DOI:**10.3920/WMJ2010.1261 | **other** |  |  |
| **305** | **Title:**Secretion stress and antifungal resistance: An Achilles' heel of Aspergillus fumigatus? | **PubMed ID:**20608779 | **other** |  |  |
| **306** | **Title:**Autophagy delivers misfolded secretory proteins accumulated in endoplasmic reticulum to vacuoles in the filamentous fungus Aspergillus oryzae | **PubMed ID:**21334308 | **other** |  |  |
| **307** | **Title:**Comparison of transcriptional and translational changes caused by long-term menadione exposure in Aspergillus nidulans | **PubMed ID:**20797444 | **other** |  |  |
| **308** | **Title:**Gibberellins producing endophytic Aspergillus fumigatus sp LH02 influenced endogenous phytohormonal levels, isoflavonoids production and plant growth in salinity stress | **DOI:**10.1016/j.procbio.2010.09.013 | **other** |  |  |
| **309** | **Title:**Protective Effects of Emodin and Chrysophanol Isolated from Marine Fungus Aspergillus sp. on Ethanol-Induced Toxicity in HepG2/CYP2E1 Cells | **PubMed ID:**21912566 | **other** |  |  |
| **310** | **Title:**Interplanetary survival probability of Aspergillus terreus spores under simulated solar vacuum ultraviolet irradiation | **DOI:**10.1016/j.pss.2010.11.002 | **other** |  |  |
| **2010** | **311** | **Title:**What makes Aspergillus fumigatus a successful pathogen? Genes and molecules involved in invasive aspergillosis | **PubMed ID:**20974273 | **oxidative** |  |  |
| **312** | **Title:**Approaching the Secrets of N-Glycosylation in Aspergillus fumigatus: Characterization of the AfOch1 Protein | **PubMed ID:**21206755 | **oxidative** | **CWI** |  |
| **313** | **Title:**Adaptative and Developmental Responses to Stress in Aspergillus nidulans | **PubMed ID:**21235506 | **oxidative** |  |  |
| **314** | **Title:**Involvement of the Aspergillus nidulans protein kinase C with farnesol tolerance is related to the unfolded protein response | **PubMed ID:**21091509 | **oxidative** | **CWI** |  |
| **315** | **Title:**Augmenting the activity of antifungal agents against aspergilli using structural analogues of benzoic acid as chemosensitizing agents | **PubMed ID:**20943191 | **oxidative** |  |  |
| **316** | **Title:**Truncated Afyap1 Attenuates Antifungal Susceptibility of Aspergillus fumigatus to Voriconazole and Confers Adaptation of the Fungus to Oxidative Stress | **PubMed ID:**20376564 | **oxidative** |  |  |
| **317** | **Title:**Genes differentially expressed by Aspergillus carbonarius strains under ochratoxin A producing conditions | **PubMed ID:**20655122 | **oxidative** |  |  |
| **318** | **Title:**Enemy of the (immunosuppressed) state: an update on the pathogenesis of Aspergillus fumigatus infection | **PubMed ID:**20618330 | **oxidative** |  |  |
| **319** | **Title:**Role of Trehalose Biosynthesis in Aspergillus fumigatus Development, Stress Response, and Virulence | **PubMed ID:**20439478 | **oxidative** | **CWI** |  |
| **320** | **Title:**Heptahelical Receptors GprC and GprD of Aspergillus fumigatus Are Essential Regulators of Colony Growth, Hyphal Morphogenesis, and Virulence | **PubMed ID:**20418440 | **oxidative** |  |  |
| **321** | **Title:**Analysis of the cellular Aspergillus fumigatus proteome that reacts with sera from rabbits developing an acquired immunity after experimental aspergillosis | **PubMed ID:**20564691 | **oxidative** |  |  |
| **322** | **Title:**Novel insights into the functional role of three protein arginine methyltransferases in Aspergillus nidulans | **PubMed ID:**20338257 | **oxidative** |  |  |
| **323** | **Title:**DNA Damage and DNA Damage Responses in THP-1 Monocytes after Exposure to Spores of either Stachybotrys chartarum or Aspergillus versicolor or to T-2 toxin | **PubMed ID:**20150440 | **oxidative** |  |  |
| **324** | **Title:**The intra- and extracellular proteome of Aspergillus niger growing on defined medium with xylose or maltose as carbon substrate | **PubMed ID:**20406453 | **oxidative** |  |  |
| **325** | **Title:**Aspergillus oryzae flavohemoglobins promote oxidative damage by hydrogen peroxide | **PubMed ID:**20211603 | **oxidative** |  |  |
| **326** | **Title:**Distinct enzymatic and cellular characteristics of two secretory phospholipases A(2) in the filamentous fungus Aspergillus oryzae | **PubMed ID:**20045482 | **oxidative** |  |  |
| **327** | **Title:**AtfA bZIP-type transcription factor regulates oxidative and osmotic stress responses in Aspergillus nidulans | **PubMed ID:**20131067 | **oxidative** | **osmotic** |  |
| **328** | **Title:**Beyond aflatoxin: four distinct expression patterns and functional roles associated with Aspergillus flavus secondary metabolism gene clusters | **PubMed ID:**20447271 | **oxidative** |  |  |
| **329** | **Title:**Lipoperoxidation affects ochratoxin A biosynthesis in Aspergillus ochraceus and its interaction with wheat seeds | **PubMed ID:**20101489 | **oxidative** |  |  |
| **330** | **Title:**Tolerance of arsenate-induced stress in Aspergillus niger, a possible candidate for bioremediation | **PubMed ID:**19811831 | **oxidative** | **heavy metal** |  |
| **331** | **Title:**Phylogeny of fungal hemoglobins and expression analysis of the Aspergillus oryzae flavohemoglobin gene fhbA during hyphal growth | **PubMed ID:**20960969 | **oxidative** |  |  |
| **332** | **Title:**Functional analysis of the superoxide dismutase family in Aspergillus fumigatus | **PubMed ID:**20487287 | **oxidative** |  |  |
| **333** | **Title:**Aflatoxigenesis induced in Aspergillus flavus by oxidative stress and reduction by phenolic antioxidants from tree nuts | **DOI:**10.3920/WMJ2009.1185 | **oxidative** |  |  |
| **334** | **Title:**Integrative analysis of the heat shock response in Aspergillus fumigatus | **PubMed ID:**20074381 | **oxidative** |  |  |
| **335** | **Title:**Use of the Aspergillus oryzae actin gene promoter in a novel reporter system for exploring antifungal compounds and their target genes | **PubMed ID:**20464390 | **osmotic** |  |  |
| **336** | **Title:**Modelling growth of Penicillium expansum and Aspergillus niger at constant and fluctuating temperature conditions | **PubMed ID:**20413170 | **osmotic** |  |  |
| **337** | **Title:**The relationship between cellular and calcium responses of Aspergillus awamori to external influences | **DOI:**10.1134/S0026261710030033 | **osmotic** |  |  |
| **338** | **Title:**Functional analysis of cell wall stress sensor proteins WscA and WscB from Aspergillus nidulans | **DOI:**10.1016/j.jbiotec.2010.09.414 | **CWI** |  |  |
| **339** | **Title:**AfMkk2 is required for cell wall integrity signaling, adhesion, and full virulence of the human pathogen Aspergillus fumigatus | **PubMed ID:**20452278 | **CWI** |  |  |
| **340** | **Title:**Transcriptional Regulation of Chitin Synthases by Calcineurin Controls Paradoxical Growth of Aspergillus fumigatus in Response to Caspofungin | **PubMed ID:**20124000 | **CWI** |  |  |
| **341** | **Title:**The role of thiol species in the tolerance of Aspergillus niger b77 to cadmium ions | **ISSN:**0209-4541 | **heavy metal** |  |  |
| **342** | **Title:**The effectiveness of arbuscular-mycorrhizal fungi and Aspergillus niger or Phanerochaete chrysosporium treated organic amendments from olive residues upon plant growth in a semi-arid degraded soil | **PubMed ID:**20705386 | **other** |  |  |
| **343** | **Title:**Global gene expression analysis of Aspergillus nidulans reveals metabolic shift and transcription suppression under hypoxia | **PubMed ID:**20878186 | **other** |  |  |
| **344** | **Title:**Transcriptome analysis of nitrate assimilation in Aspergillus nidulans reveals connections to nitric oxide metabolism | **PubMed ID:**20969648 | **other** |  |  |
| **345** | **Title:**Effect of stirring and pump on membrane processing of Aspergillus carbonarius culture broth for polygalacturonase | **DOI:**10.1016/j.bej.2010.07.010 | **other** |  |  |
| **346** | **Title:**Biodegradation of phenol by free and encapsulated cells of a new Aspergillus sp isolated from a contaminated site in southern Brazil | **ISSN:**1684-5315 | **other** |  |  |
| **347** | **Title:**Spatial and Developmental Differentiation of Mannitol Dehydrogenase and Mannitol-1-Phosphate Dehydrogenase in Aspergillus niger | **PubMed ID:**20305000 | **other** |  |  |
| **348** | **Title:**Identification and characterisation of eroA and ervA, encoding two putative thiol oxidases from Aspergillus niger | **PubMed ID:**20438816 | **other** |  |  |
| **349** | **Title:**Proteome Profiling and Functional Classification of Intracellular Proteins from Conidia of the Human-Pathogenic Mold Aspergillus fumigatus | **PubMed ID:**20507060 | **other** |  |  |
| **350** | **Title:**Characterisation of the CipC-like protein AFUA_5G09330 of the opportunistic human pathogenic mould Aspergillus fumigatus | **PubMed ID:**19486301 | **other** |  |  |
| **351** | **Title:**Identification of modules in Aspergillus niger by gene co-expression network analysis | **PubMed ID:**20350613 | **other** |  |  |
| **352** | **Title:**Identification of possible targets of the Aspergillus fumigatus CRZ1 homologue, CrzA | **PubMed ID:**20078882 | **other** |  |  |
| **353** | **Title:**A Novel Motif in Fungal Class 1 Histone Deacetylases Is Essential for Growth and Development of Aspergillus | **PubMed ID:**19940017 | **other** |  |  |
| **354** | **Title:**AoSO protein accumulates at the septal pore in response to various stresses in the filamentous fungus Aspergillus oryzae | **PubMed ID:**19945422 | **other** |  |  |
| **355** | **Title:**Morphology of Filamentous Fungi: Linking Cellular Biology to Process Engineering Using Aspergillus niger | **PubMed ID:**20490972 | **other** |  |  |
| **356** | **Title:**Mutagenesis of Aspergillus oryzae ipt-301 to improve the production of beta-fructofuranosidase | **PubMed ID:**24031480 | **other** |  |  |
| **357** | **Title:**PR10 expression in maize and its effect on host resistance against Aspergillus flavus infection and aflatoxin production | **PubMed ID:**20078777 | **other** |  |  |
| **358** | **Title:**Transcriptional responses of Folsomia candida upon exposure to Aspergillus nidulans secondary metabolites in single and mixed diets | **DOI:**10.1016/j.pedobi.2010.09.002 | **other** |  |  |
| **2009** | **359** | **Title:**Proteome analysis of Aspergillus niger: Lactate added in starch-containing medium can increase production of the mycotoxin fumonisin B-2 by modifying acetyl-CoA metabolism | **PubMed ID:**20003296 | **oxidative** |  |  |
| **360** | **Title:**Aspergillus oryzae atfA controls conidial germination and stress tolerance | **PubMed ID:**19770065 | **oxidative** |  |  |
| **361** | **Title:**Effect of ozone on spore germination, spore production and biomass production in two Aspergillus species | **PubMed ID:**19533409 | **oxidative** |  |  |
| **362** | **Title:**Transcriptional profiling for Aspergillus nidulans HogA MAPK signaling pathway in response to fludioxonil and osmotic stress | **PubMed ID:**19596074 | **oxidative** | **osmotic** |  |
| **363** | **Title:**HdaA, a class 2 histone deacetylase of Aspergillus fumigatus, affects germination and secondary metabolite production | **PubMed ID:**19563902 | **oxidative** |  |  |
| **364** | **Title:**Phenotypic analysis of genes whose mRNA accumulation is dependent on calcineurin in Aspergillus fumigatus | **PubMed ID:**19573616 | **oxidative** |  |  |
| **365** | **Title:**Reduction of Aspergillus parasiticus on hazelnut surface by UV-C treatment | **DOI:**10.1111/j.1365-2621.2009.02011.x | **oxidative** |  |  |
| **366** | **Title:**Crawler, a novel Tc1/mariner-type transposable element in Aspergillus oryzae transposes under stress conditions | **PubMed ID:**19269345 | **oxidative** |  |  |
| **367** | **Title:**Functional characterization of the Aspergillus nidulans methionine sulfoxide reductases (msrA and msrB) | **PubMed ID:**19373970 | **oxidative** |  |  |
| **368** | **Title:**The Glutathione System of Aspergillus nidulans Involves a Fungus-specific Glutathione S-Transferase | **PubMed ID:**19171936 | **oxidative** |  |  |
| **369** | **Title:**Ethylene inhibited aflatoxin biosynthesis is due to oxidative stress alleviation and related to glutathione redox state changes in Aspergillus flavus | **PubMed ID:**19162358 | **oxidative** |  |  |
| **370** | **Title:**Deletion of the Protein Kinase A Regulatory Subunit Leads to Deregulation of Mitochondrial Activation and Nuclear Duplication in Aspergillus fumigatus | **PubMed ID:**19124579 | **oxidative** |  |  |
| **371** | **Title:**Effective lead selection for improved protein production in Aspergillus niger based on integrated genomics | **PubMed ID:**18824119 | **oxidative** |  |  |
| **372** | **Title:**Annotation of stress-response proteins in the aspergilli | **PubMed ID:**18703157 | **oxidative** | **osmotic** |  |
| **373** | **Title:**A survey of nonribosomal peptide synthetase (NRPS) genes in Aspergillus nidulans | **PubMed ID:**18804170 | **oxidative** |  |  |
| **374** | **Title:**Effect of natural maize phytochemicals on Aspergillus section Flavi sclerotia characteristics under different conditions of growth media and water potential | **DOI:**10.1016/j.funeco.2008.10.004 | **oxidative** |  |  |
| **375** | **Title:**Proteome analysis for pathogenicity and new diagnostic markers for Aspergillus fumigatus | **PubMed ID:**18651311 | **oxidative** |  |  |
| **376** | **Title:**A Role for the Unfolded Protein Response (UPR) in Virulence and Antifungal Susceptibility in Aspergillus fumigatus | **PubMed ID:**19132084 | **oxidative** | **CWI** |  |
| **377** | **Title:**Uncovering transcriptional regulation of glycerol metabolism in Aspergilli through genome-wide gene expression data analysis | **PubMed ID:**19784673 | **osmotic** |  |  |
| **378** | **Title:**Characterization of NikA Histidine Kinase and Two Response Regulators with Special Reference to Osmotic Adaptation and Asexual Development in Aspergillus nidulans | **PubMed ID:**19584543 | **osmotic** |  |  |
| **379** | **Title:**The MpkA MAP kinase module regulates cell wall integrity signaling and pyomelanin formation in Aspergillus fumigatus | **PubMed ID:**19715768 | **CWI** |  |  |
| **380** | **Title:**Alternative Processing of Proproteins in Aspergilli kexB Gene Disruptants under Hyperosmotic Conditions | **PubMed ID:**19129662 | **CWI** |  |  |
| **381** | **Title:**Kapl, a non-essential member of the Pse1p/Imp5 karyopherin family, controls colonial and asexual development in Aspergillus nidulans | **PubMed ID:**19729403 | **other** |  |  |
| **382** | Title: Complex regulation of the aflatoxin biosynthesis gene cluster of Aspergillus flavus in relation to various combinations of water activity and temperature | **PubMed ID:**19699547 | **other** |  |  |
| **383** | **Title:**Influence of physiological factors on growth, sporulation and ochratoxin A/B production of the new Aspergillus ochraceus grouping | **DOI:**10.3920/WMJ2009.1156 | **other** |  |  |
| **384** | **Title:**The bZIP-type transcription factor FlbB regulates distinct morphogenetic stages of colony formation in Aspergillus nidulans | **PubMed ID:**19656299 | **other** |  |  |
| **385** | **Title:**Gamma radiation on the mycoflora of poultry feed and Aspergillus species | **DOI:**10.1590/S0103-84782009005000076 | **other** |  |  |
| **386** | **Title:**Exploring temporal transcription regulation structure of Aspergillus fumigatus in heat shock by state space model | **PubMed ID:**19586549 | **other** |  |  |
| **387** | **Title:**The nsdC Gene Encoding a Putative C2H2-Type Transcription Factor Is a Key Activator of Sexual Development in Aspergillus nidulans | **PubMed ID:**19416940 | **other** |  |  |
| **388** | **Title:**Aspergillus fumigatus Calcipressin CbpA Is Involved in Hyphal Growth and Calcium Homeostasis | **PubMed ID:**19252123 | **other** |  |  |
| **389** | **Title:**Cloning and characterization of two flavohemoglobins from Aspergillus oryzae | **PubMed ID:**19351585 | **other** |  |  |
| **390** | **Title:**Genomics of protein folding in the endoplasmic reticulum, secretion stress and glycosylation in the aspergilli | **DOI:**10.1016/j.fgb.2008.07.016 | **other** |  |  |
| **391** | **Title:**Transcriptomic comparison of Aspergillus niger growing on two different sugars reveals coordinated regulation of the secretory pathway | **PubMed ID:**19166577 | **other** |  |  |
| **392** | **Title:**Aspergillus fumigatus metabolism: Clues to mechanisms of in vivo fungal growth and virulence | **PubMed ID:**19253141 | **other** |  |  |
| **393** | **Title:**Recombinant bacterial hemoglobin alters metabolism of Aspergillus niger | **PubMed ID:**18694843 | **other** |  |  |
| **394** | **Title:**Aspergillus nidulans FlbE is an upstream developmental activator of conidiation functionally associated with the putative transcription factor FlbB | **PubMed ID:**19007409 | **other** |  |  |
| **2008** | **395** | **Title:**Heat-shock-induced oxidative stress and antioxidant response in Aspergillus niger 26 | **PubMed ID:**19096452 | **oxidative** |  |  |
| **396** | **Title:**Silencing of mitochondrial alternative oxidase gene of Aspergillus fumigatus enhances reactive oxygen species production and killing of the fungus by macrophages | **PubMed ID:**19148712 | **oxidative** |  |  |
| **397** | **Title:**Biochemical properties of Cu/Zn-superoxide dismutase from fungal strain Aspergillus niger 26 | **PubMed ID:**18395490 | **oxidative** |  |  |
| **398** | Title: Characterization of bZip-Type Transcription Factor AtfA with Reference to Stress Responses of Conidia of Aspergillus nidulans | **PubMed ID:**18838792 | **oxidative** |  |  |
| **399** | **Title:**Aspergillus parasiticus crzA, Which Encodes Calcineurin Response Zinc-Finger Protein, Is Required for Aflatoxin Production under Calcium Stress | **PubMed ID:**19325734 | **oxidative** | **osmotic** |  |
| **400** | Title: SreA-mediated iron regulation in Aspergillus fumigatus | **PubMed ID:**18721228 | **oxidative** |  |  |
| **401** | **Title:**Oxidative stress-associated impairment of glucose and ammonia metabolism in the filamentous fungus, Aspergillus niger B1-D | **PubMed ID:**18693104 | **oxidative** |  |  |
| **402** | **Title:**Regulation of apical dominance in Aspergillus nidulans hyphae by reactive oxygen species | **PubMed ID:**18689883 | **oxidative** |  |  |
| **403** | **Title:**The effects of elevated process temperature on the protein carbonyls in the filamentous fungus, Aspergillus niger B1-D | **DOI:**10.1016/j.procbio.2008.04.006 | **oxidative** |  |  |
| **404** | **Title:**Chemosensitization prevents tolerance of Aspergillus fumigatus to antimycotic drugs | **PubMed ID:**18486603 | **oxidative** | **osmotic** | **CWI** |
| **405** | **Title:**Defects in conidiophore development and conidium-macrophage interactions in a dioxygenase mutant of Aspergillus fumigatus | **PubMed ID:**18443090 | **oxidative** |  |  |
| **406** | **Title:**Modulation of antioxidant defense in Aspergillus parasiticus is involved in aflatoxin biosynthesis: a role for the ApyapA gene | **PubMed ID:**18441122 | **oxidative** |  |  |
| **407** | Title: Aspergillus oryzae atfB encodes a transcription factor required for stress tolerance in conidia | **PubMed ID:**18448366 | **oxidative** | **osmotic** |  |
| **408** | **Title:**The mitogen-activated protein kinase MpkA of Aspergillus fumigatus regulates cell wall signaling and oxidative stress response | **PubMed ID:**17981060 | **oxidative** | **CWI** |  |
| **409** | **Title:**Potential basis for amphotericin B resistance in Aspergillus terreus | **PubMed ID:**18268082 | **oxidative** |  |  |
| **410** | **Title:**The sho1 sensor regulates growth, morphology, and oxidant adaptation in Aspergillus fumigatus but is not essential for development of invasive pulmonary aspergillosis | **PubMed ID:**18227163 | **oxidative** |  |  |
| **411** | **Title:**Functional characterization of the putative Aspergillus nidulans DNA damage binding protein homologue DdbA | **PubMed ID:**18060432 | **oxidative** |  |  |
| **412** | **Title:**Oxygen enrichment effects on protein oxidation, proteolytic activity and the energy status of submerged batch cultures of Aspergillus niger B1-D | **DOI:**10.1016/j.procbio.2007.11.016 | **oxidative** |  |  |
| **413** | **Title:**Adaptive response to oxidative stress in the filamentous fungus Aspergillus niger B1-D | **PubMed ID:**17967428 | **oxidative** |  |  |
| **414** | **Title:**A novel screening method for cell wall mutants in Aspergillus niger identifies UDP-galactopyranose mutase as an important protein in fungal cell wall biosynthesis | **PubMed ID:**18245853 | **oxidative** | **CWI** |  |
| **415** | **Title:**Cd (II) stress response during the growth of Aspergillus niger B 77 | **PubMed ID:**17850314 | **oxidative** | **heavy metal** |  |
| **416** | **Title:**Afyap1, encoding a bZip transcriptional factor of Aspergillus fumigatus, contributes to oxidative stress response but is not essential to the virulence of this pathogen in mice immunosuppressed by cyclophosphamide and triamcinolone | **PubMed ID:**18608886 | **oxidative** |  |  |
| **417** | **Title:**The mitogen activated protein kinase MpkA of Aspergillus fumigatus is involved in cell wall signaling and oxidative stress response | **PubMed ID:**17981060 | **oxidative** |  |  |
| **418** | **Title:**Depletion of the MobB and CotA complex in Aspergillus nidulans causes defects in polarity maintenance that can be suppressed by the environment stress | **PubMed ID:**18832040 | **osmotic** |  |  |
| **419** | **Title:**A defect of ligD (human lig4 homolog) for nonhomologous end joining significantly improves efficiency of gene-targeting in Aspergillus oryzae | **PubMed ID:**18282727 | **osmotic** |  |  |
| **420** | **Title:**Lovastatin biosynthetic genes of Aspergillus terreus are expressed differentially in solid-state and in liquid submerged fermentation | **PubMed ID:**18414850 | **osmotic** |  |  |
| **421** | **Title:**Functional analysis of C(2)H(2) zinc finger transcription factor CrzA involved in calcium signaling in Aspergillus nidulans | **PubMed ID:**19002465 | **CWI** |  |  |
| **422** | **Title:**Two zinc finger transcription factors, CrzA and SltA, are involved in cation homoeostasis and detoxification in Aspergillus nidulans | **PubMed ID:**18471095 | **CWI** |  |  |
| **423** | **Title:**Calcineurin target CrzA regulates conidial germination, hyphal growth, and pathogenesis of Aspergillus fumigatus | **PubMed ID:**18456861 | **CWI** |  |  |
| **424** | **Title:**Proteomic and Transcriptomic Analysis of Aspergillus fumigatus on Exposure to Amphotericin B | **PubMed ID:**18838595 | **other** |  |  |
| **425** | **Title:**Rapid method for testing the susceptibility of Aspergillus fumigatus to amphotericin B, itraconazole, voriconazole and posaconazole by assessment of oxygen consumption | **PubMed ID:**18824456 | **other** |  |  |
| **426** | **Title:**The Aspergillus nidulans stress response transcription factor StzA is ascomycete-specific and shows species-specific polymorphisms in the C-terminal region | **PubMed ID:**18678248 | **other** |  |  |
| **427** | **Title:**A Comparison of the Unfolded Protein Response in Solid-State with Submerged Cultures of Aspergillus oryzae | **PubMed ID:**18997417 | **other** |  |  |
| **428** | **Title:**Isolation and Characterization of an Extracellular Antimicrobial Protein from Aspergillus oryzae | **PubMed ID:**18803391 | **other** |  |  |
| **429** | **Title:**Identification of genes differentially expressed in a strain of the mold Aspergillus nidulans carrying a loss-of-function mutation in the palA gene | **PubMed ID:**18923548 | **other** |  |  |
| **430** | **Title:**Calcineurin localizes to the hyphal septum in Aspergillus fumigatus: Implications for septum formation and conidiophore development | **PubMed ID:**18606829 | **other** |  |  |
| **431** | **Title:**Adaptive Melanin Response of the Soil Fungus Aspergillus niger to UV Radiation Stress at "Evolution Canyon'', Mount Carmel, Israel | **PubMed ID:**18714346 | **other** |  |  |
| **432** | **Title:**Protein kinase a regulates growth, sporulation, and pigment formation in Aspergillus fumigatus | **PubMed ID:**18539819 | **other** |  |  |
| **433** | **Title:**Effect of cultivation pH and agitation rate on growth and xylanase production by Aspergillus oryzae in spent sulphite liquor | **PubMed ID:**18239946 | **other** |  |  |
| **434** | **Title:**Effect of solute and matric potential on in vitro growth and sporulation of strains from a new population of Aspergillus flavus isolated in Italy | **DOI:**10.1016/j.funeco.2008.07.001 | **other** |  |  |
| **435** | **Title:**Basal expression of the Aspergillus fumigatus transcriptional activator CpcA is sufficient to support pulmonary aspergillosis | **PubMed ID:**18249572 | **other** |  |  |
| **436** | **Title:**Impaired ribosome biogenesis disrupts the integration between morphogenesis and nuclear duplication during the germination of Aspergillus fumigatus | **PubMed ID:**18296619 | **other** |  |  |
| **437** | **Title:**The effects of bioprocess parameters on extracellular proteases in a recombinant Aspergillus niger B1-D | **PubMed ID:**18074130 | **other** |  |  |
| **438** | **Title:**Variation in mycelial growth and morphology of Aspergillus niger with changes in shear stress | **ISSN:**0973-6263 | **other** |  |  |
| **439** | **Title:**Enhancement of fructanohydrolase synthesis from Aspergillus niger by simultaneous in vitro induction and in vivo acid stress using sucrose ester | **DOI:**10.1007/s11274-007-9450-3 | **other** |  |  |
| **2007** | **440** | **Title:**The Aspergillus fumigatus transcriptional regulator AfYap1 represents the major regulator for defense against reactive oxygen intermediates but is dispensable for pathogenicity in an intranasal mouse infection model | **PubMed ID:**17921349 | **oxidative** |  |  |
| **441** | **Title:**Arginine catabolism in Aspergillus nidulans is regulated by the rrmA gene coding for the RNA-binding protein | **PubMed ID:**17719249 | **oxidative** |  |  |
| **442** | **Title:**Survival in the presence of antifungals - Genome-wide expression profiling of aspergillus niger in response to sublethal concentrations of caspofungin and fenpropimorph | **PubMed ID:**17804411 | **oxidative** | **CWI** |  |
| **443** | **Title:**Inhibition of ochratoxin - A production and growth of Aspergillus species by phenolic antioxidant compounds | **PubMed ID:**17874203 | **oxidative** |  |  |
| **444** | **Title:**A Novel Regulator Couples Sporogenesis and Trehalose Biogenesis in Aspergillus nidulans | **PubMed ID:**17912349 | **oxidative** |  |  |
| **445** | **Title:**In vitro analysis of His-Asp phosphorelays in Aspergillus nidulans: The first direct biochemical evidence for the existence of His-Asp phosphotransfer systems in filamentous fungi | **PubMed ID:**17928704 | **oxidative** |  |  |
| **446** | **Title:**Transcriptome analysis of the Aspergillus nidulans AtmA (ATM, Ataxia-Telanglectasia mutated) null mutant | **PubMed ID:**17880424 | **oxidative** |  |  |
| **447** | **Title:**The thioredoxin system of the filamentous fungus Aspergillus nidulans - Impact on development and oxidative stress response | **PubMed ID:**17631497 | **oxidative** |  |  |
| **448** | **Title:**Response regulators SrrA and SskA are central components of a phosphorelay system involved in stress signal transduction and asexual sporulation in Aspergillus nidulans | **PubMed ID:**17630329 | **oxidative** | **osmotic** | **CWI** |
| **449** | **Title:**Distinct roles for intra- and extracellular siderophores during Aspergillus fumigatus infection | **PubMed ID:**17845073 | **oxidative** |  |  |
| **450** | **Title:**Novel reporter gene expression systems for monitoring activation of the Aspergillus nidulans HOG pathway | **PubMed ID:**17617716 | **oxidative** | **osmotic** |  |
| **451** | **Title:**Characterization of the bZip-type transcription factor NapA with reference a to oxidative stress response in Aspergillus nidulans | **PubMed ID:**17617701 | **oxidative** |  |  |
| **452** | **Title:**Characterization of the SKN7 ortholog of Aspergillus fumigatus | **PubMed ID:**17337219 | **oxidative** |  |  |
| **453** | **Title:**Introduction to bioreactors of shake-flask inocula leads to development of oxidative stress in Aspergillus niger | **PubMed ID:**17351717 | **oxidative** |  |  |
| **454** | **Title:**Cloning and functional expression of the mitochondrial alternative oxidase of Aspergillus fumigatus and its induction by oxidative stress | **PubMed ID:**17425662 | **oxidative** |  |  |
| **455** | **Title:**Nonribosomal peptide synthesis in Aspergillus fumigatus and other fungi | **PubMed ID:**17464044 | **oxidative** |  |  |
| **456** | **Title:**The SskA and SrrA response regulators are implicated in oxidative stress responses of hyphae and asexual spores in the phosphorelay signaling network of Aspergillus nidulans | **PubMed ID:**17420584 | **oxidative** |  |  |
| **457** | **Title:**Apyap1 affects aflatoxin biosynthesis during Aspergillus parasiticus growth in maize seeds | **PubMed ID:**17886179 | **oxidative** |  |  |
| **458** | **Title:**Proteome map of Aspergillus nidulans during osmoadaptation | **PubMed ID:**17258477 | **osmotic** |  |  |
| **459** | **Title:**MpkA-dependent and -independent cell wall integrity signaling in Aspergillus nidulans | **PubMed ID:**17601879 | **osmotic** | **CWI** |  |
| **460** | **Title:**Osmotic stress limits arsenic hypertolerance in Aspergillus sp P37 | **PubMed ID:**17578525 | **osmotic** |  |  |
| **461** | **Title:**The antifungal protein AFP from Aspergillus giganteus inhibits chitin synthesis in sensitive fungi | **PubMed ID:**17277210 | **CWI** |  |  |
| **462** | **Title:**Unexpected link between metal ion deficiency and autophagy in Aspergillus fumigatus | **PubMed ID:**17921348 | **heavy metal** |  |  |
| **463** | **Title:**Responses in the mycelial growth of Aspergillus niger isolates to arsenic contaminated environments and their resistance to exogenic metal stress | **PubMed ID:**17647207 | **heavy metal** |  |  |
| **464** | **Title:**Potential use of phenolic antioxidants on peanut control growth and aflatoxin B-1 accumulation by Aspergillus flavus and Aspergillus parasiticus | **DOI:**10.1002/jsfa.2975 | **other** |  |  |
| **465** | **Title:**Induction of contour sensing in Aspergillus niger by stress and its relevance to fungal growth mechanics and hyphal tip structure | **PubMed ID:**17267249 | **other** |  |  |
| **466** | **Title:**Is catalase activity one of the factors associated with maize resistance to Aspergillus flavus? | **PubMed ID:**17555277 | **other** |  |  |
| **467** | **Title:**Influence of water activity, pH, and temperature on growth of Aspergillus penicillioides and A. terreus, isolated from dry and salted skipjack tuna (Katsuwonus pelamis) meat. | **ISSN:**0798-2259 | **other** |  |  |
| **468** | **Title:**Interrelation of growth media and water activity in sclerotia characteristics of Aspergillus section Flavi | **PubMed ID:**17257253 | **other** |  |  |
| **469** | **Title:**The Aspergillus fumigatus metacaspases CasA and CasB facilitate growth under conditions of endoplasmic reticulum stress | **PubMed ID:**17176258 | **other** |  |  |
| **470** | **Title:**Microcycle conidiation and medusa head conidiophores of aspergilli on indoor construction materials and air filters from hospitals | **PubMed ID:**17663117 | **other** |  |  |
| **2006** | **471** | **Title:**Novel mitogen-activated protein kinase MpkC of Aspergillus fumigatus is required for utilization of polyalcohol sugars | **PubMed ID:**16998074 | **oxidative** | **osmotic** |  |
| **472** | **Title:**The intracellular siderophore ferricrocin is involved in iron storage, oxidative-stress resistance, germination, and sexual development in Aspergillus nidulans | **PubMed ID:**17030991 | **oxidative** |  |  |
| **473** | **Title:**Transcriptome analysis of Aspergillus nidulans exposed to camptothecin-induced DNA damage | **PubMed ID:**17030995 | **oxidative** |  |  |
| **474** | **Title:**Programmed cell death in the aspergilli and other filamentous fungi | **DOI:**10.1080/13693780600835765 | **oxidative** |  |  |
| **475** | **Title:**Polyol synthesis in Aspergillus niger: Influence of oxygen availability, carbon and nitrogen sources on the metabolism | **PubMed ID:**16718677 | **oxidative** |  |  |
| **476** | **Title:**A nonribosomal peptide synthetase (Pes1) confers protection against oxidative stress in Aspergillus fumigatus | **PubMed ID:**16759234 | **oxidative** |  |  |
| **477** | **Title:**Evaluation of bioremediation and detoxification potentiality of Aspergillus niger for removal of hexavalent chromium in soil microcosm | **DOI:**10.1016/j.soilbio.2005.12.016 | **oxidative** | **heavy metal** |  |
| **478** | **Title:**Signalling and oxidant adaptation in Candida albicans and Aspergillus fumigatus | **PubMed ID:**16710324 | **oxidative** | **osmotic** |  |
| **479** | **Title:**The role of the sakA (Hog1) and tcsB (s1n1) genes in the oxidant adaptation of Aspergillus fumigatus | **PubMed ID:**16702099 | **oxidative** |  |  |
| **480** | **Title:**Analysis of major intracellular proteins of Aspergillus fumigatus by MALDI mass spectrometry: Identification and characterisation of an elongation factor 1B protein with glutathione transferase activity | **PubMed ID:**16455047 | **oxidative** |  |  |
| **481** | **Title:**Effects of N,N-bis(3-aminopropyl)dodecylamine on antioxidant enzyme activities, mitochondrial morphology and metabolism in Aspergillus niger | **PubMed ID:**16821710 | **oxidative** |  |  |
| **482** | **Title:**Comparative studies of differential expression of chitinolytic enzymes encoded by chiA, chiB, chiC and nagA genes in Aspergillus nidulans | **PubMed ID:**17455791 | **oxidative** |  |  |
| **483** | **Title:**Effects of mutations in the GanB/RgsA G protein mediated signalling on the autolysis of Aspergillus nidulans | **PubMed ID:**17139616 | **oxidative** |  |  |
| **484** | **Title:**Bioleaching nickel laterite ores using multi-metal tolerant Aspergillus foetidus organism | **DOI:**10.1016/j.mineng.2006.02.006 | **heavy metal** |  |  |
| **485** | **Title:**Characterisation of the laccase-encoding gene abr2 of the dihydroxynaphthalene-like melanin gene cluster of Aspergillus fumigatus | **PubMed ID:**16988817 | **other** |  |  |
| **486** | **Title:**Agitation effects on morphology and protein productive fractions of filamentous and pelleted growth forms of recombinant Aspergillus niger | **DOI:**10.1016/j.procbio.2006.05.024 | **other** |  |  |
| **487** | **Title:**Aspergillus fumigatus induces innate immune responses in alveolar macrophages through the MAPK pathway independently of TLR2 and TLR4 | **PubMed ID:**16951362 | **other** |  |  |
| **488** | **Title:**The mitochondrial protein Bak is pivotal for gliotoxin-induced apoptosis and a critical host factor of Aspergillus fumigatus virulence in mice | **PubMed ID:**16893972 | **other** |  |  |
| **489** | **Title:**HACA, the transcriptional activator of the unfolded protein response (UPR) in Aspergillus niger, binds to partly palindromic UPR elements of the consensus sequence 5 '-CAN(G/A) NTGT/GCCT-3 ' | **PubMed ID:**16709461 | **other** |  |  |
| **490** | **Title:**Targeting antioxidative signal transduction and stress response system: control of pathogenic Aspergillus with phenolics that inhibit mitochondrial function | **PubMed ID:**16834605 | **other** |  |  |
| **491** | **Title:**Heterotrimeric G protein signaling and RGSs in Aspergillus nidulans | **PubMed ID:**16728950 | **other** |  |  |
| **492** | **Title:**HaCAV-Independent induction of chaperone-encoding gene bipA in Aspergillus niger strains overproducing membrane proteins | **PubMed ID:**16391143 | **other** |  |  |
| **493** | **Title:**Nucleolar localization of Aspergillus fumigatus CgrA is temperature-dependent | **PubMed ID:**16314125 | **other** |  |  |
| **494** | **Title:**Metabolic network driven analysis of genome-wide transcription data from Aspergillus nidulans | **PubMed ID:**17107606 | **other** |  |  |
| **2005** | **495** | **Title:**Comparison of gene expression signatures of diamide, H2O2 and menadione exposed Aspergillus nidulans cultures - linking genome-wide transcriptional changes to cellular physiology | **PubMed ID:**16368011 | **oxidative** |  |  |
| **496** | **Title:**Antioxidant enzymes stimulation in Aspergillus parasiticus by Lentinula edodes inhibits aflatoxin production | **PubMed ID:**15838675 | **oxidative** |  |  |
| **497** | **Title:**HdaA, a major class 2 histone deacetylase of Aspergillus nidulans, affects growth under conditions of oxidative stress | **PubMed ID:**16215180 | **oxidative** |  |  |
| **498** | **Title:**Role of mycoferritin from Aspergillus parasiticus (255) in secondary metabolism (aflatoxin production) | **PubMed ID:**16143460 | **oxidative** |  |  |
| **499** | **Title:**The pkaB gene encoding the secondary protein kinase a catalytic subunit has a synthetic lethal interaction with pkaA and plays overlapping and opposite roles in Aspergillus nidulans | **PubMed ID:**16087751 | **oxidative** |  |  |
| **500** | **Title:**Aspergillus cyclooxygenase-like enzymes are associated with prostaglandin production and virulence | **PubMed ID:**16040966 | **oxidative** |  |  |
| **501** | **Title:**Oxygen stress in Aspergillus niger | **ISSN:**0168-1656 | **oxidative** |  |  |
| **502** | **Title:**Antifungal protein PAF severely affects the integrity of the plasma membrane of Aspergillus nidulans and induces an apoptosis-like phenotype | **PubMed ID:**15917545 | **oxidative** |  |  |
| **503** | **Title:**Examination of fungal stress response genes using Saccharomyces cerevisiae as a model system: targeting genes affecting aflatoxin biosynthesis by Aspergillus flavus Link | **PubMed ID:**15614562 | **oxidative** |  |  |
| **504** | **Title:**Cloning and expression analysis of two catalase genes from Aspergillus oryzae | **PubMed ID:**16233832 | **oxidative** |  |  |
| **505** | **Title:**Aspergillus nidulans HOG pathway is activated only by two-component signalling pathway in response to osmotic stress | **PubMed ID:**15882418 | **oxidative** | **osmotic** |  |
| **506** | **Title:**Identification, cloning, and functional expression of three glutathione transferase genes from Aspergillus fumigatus | **PubMed ID:**15749051 | **oxidative** |  |  |
| **507** | **Title:**Antioxidative catechol lignans converted from sesamin and sesaminol triglucoside by culturing with Aspergillus | **PubMed ID:**15631503 | **oxidative** |  |  |
| **508** | **Title:**Role of antioxidant enzymes in survival of conidiospores of Aspergillus niger 26 under conditions of temperature stress | **PubMed ID:**16162242 | **oxidative** |  |  |
| **509** | **Title:**Alkaline pH-induced up-regulation of the afp gene encoding the antifungal protein (AFP) of Aspergillus giganteus is not mediated by the transcription factor PacC: possible involvement of calcineurin | **PubMed ID:**16133167 | **osmotic** |  |  |
| **510** | **Title:**Mitogen activated protein kinases of Aspergillus fumigatus | **PubMed ID:**16110797 | **osmotic** |  |  |
| **511** | **Title:**The class V chitin synthase gene csmA is crucial for the growth of the chsA chsC double mutant in Aspergillus nidulans | **PubMed ID:**15665472 | **osmotic** | **CWI** |  |
| **512** | Title: The Aspergillus niger MADS-box transcription factor RlmA is required for cell wall reinforcement in response to cell wall stress | **PubMed ID:**16164567 | **CWI** |  |  |
| **513** | **Title:**Expression of agsA, one of five 1,3-alpha-D-glucan synthase-encoding genes in Aspergillus niger, is induced in response to cell wall stress | **PubMed ID:**15670714 | **CWI** |  |  |
| **514** | Title: Production of catalases by Aspergillus niger isolates as a response to pollutant stress by heavy metals | **PubMed ID:**15902463 | **heavy metal** |  |  |
| **515** | **Title:**Influence of mechanical stress and surface interaction on the aggregation of Aspergillus niger conidia | **PubMed ID:**16255057 | **other** |  |  |
| **516** | **Title:**Screening of growth- or development-related genes by using genomic library with inducible promoter in Aspergillus nidulans | **PubMed ID:**16410769 | **other** |  |  |
| **517** | **Title:**UPR-independent dithiothreitol stress-induced genes in Aspergillus niger | **PubMed ID:**16160852 | **other** |  |  |
| **518** | **Title:**In vitro selection of maize rhizobacteria to study potential biological control of Aspergillus section Flavi and aflatoxin production | **DOI:**10.1007/s10658-005-5548-3 | **other** |  |  |
| **519** | **Title:**Aspergillus nidulans uvsB(ATR) and scaA(NBS1) genes show genetic interactions during recovery from replication stress and DNA damage | **PubMed ID:**16002650 | **other** |  |  |
| **520** | **Title:**Comparing artificial and natural selection in rate of adaptation to genetic stress in Aspergillus nidulans | **PubMed ID:**16033548 | **other** |  |  |
| **521** | **Title:**Effect of different postharvest drying temperatures on Aspergillus flavus survival and aflatoxin content in five maize hybrids | **PubMed ID:**16013400 | **other** |  |  |
| **522** | **Title:**Thermotolerance and virulence of Aspergillus fumigatus: role of the fungal nucleolus | **PubMed ID:**16110798 | **other** |  |  |
| **523** | **Title:**Nitrogen metabolism of Aspergillus and its role in pathogenicity | **PubMed ID:**16110790 | **other** |  |  |
| **524** | **Title:**Effect of undecanoic acid on the production of esterases and lipases by Aspergillus nidulans | **ISSN:**1590-4261 | **other** |  |  |
| **525** | **Title:**Aspergillus hyphae in infected tissue: Evidence of physiologic adaptation and effect on culture recovery | **PubMed ID:**15634998 | **other** |  |  |
